# Supplementary material for: Polymerization with the Cu(i)-catalyzed Doyle–Kirmse reaction of bis(allyl sulfides) and bis(α-diazoesters)
Source: Royal Society of Chemistry journal article supplement (doi:10.1039/d2py00162d), 2022-01-01

*Electronic supplementary information (ESI)*

**Polymerization with Cu(I)-Catalyzed Doyle-Kirmse Reaction of  
Bis(allyl sulfides) and Bis( $\alpha$ -diazoesters)**

Zihao Fu,<sup>a</sup> Qi Zhou,<sup>a</sup> Yiyang Xiao,<sup>a</sup> Jianbo Wang<sup>a,b,\*</sup>

<sup>a</sup>*Beijing National Laboratory of Molecular Sciences (BNLMS) and Key Laboratory of Bioorganic Chemistry and Molecular Engineering of Ministry of Education, College of Chemistry, Peking University, Beijing 100871, China*

<sup>b</sup>*State Key Laboratory of Organometallic Chemistry, Chinese Academy of Sciences, Shanghai 200032, China*

*Email: [wangjb@pku.edu.cn](mailto:wangjb@pku.edu.cn)*

**CONTENTS**

|                                                                                |    |
|--------------------------------------------------------------------------------|----|
| 1) <sup>1</sup> H and <sup>13</sup> C NMR spectra of the monomers.....         | 2  |
| 2) <sup>1</sup> H and <sup>13</sup> C NMR spectra of the polymer products..... | 14 |
| 3) MALDI-TOF-MS spectrum of <b>P10</b> .....                                   | 25 |
| 4) HRMS analysis of hydrolysis of <b>P10</b> .....                             | 25 |
| 5) SEC traces of the polymer products.....                                     | 26 |
| 6) TGA data of the polymer products.....                                       | 28 |
| 7) DSC data of the polymer products.....                                       | 30 |

# 1) $^1\text{H}$ and $^{13}\text{C}$ NMR spectra of the monomers

$^1\text{H}$  and  $^{13}\text{C}$  NMR spectra of **4a**

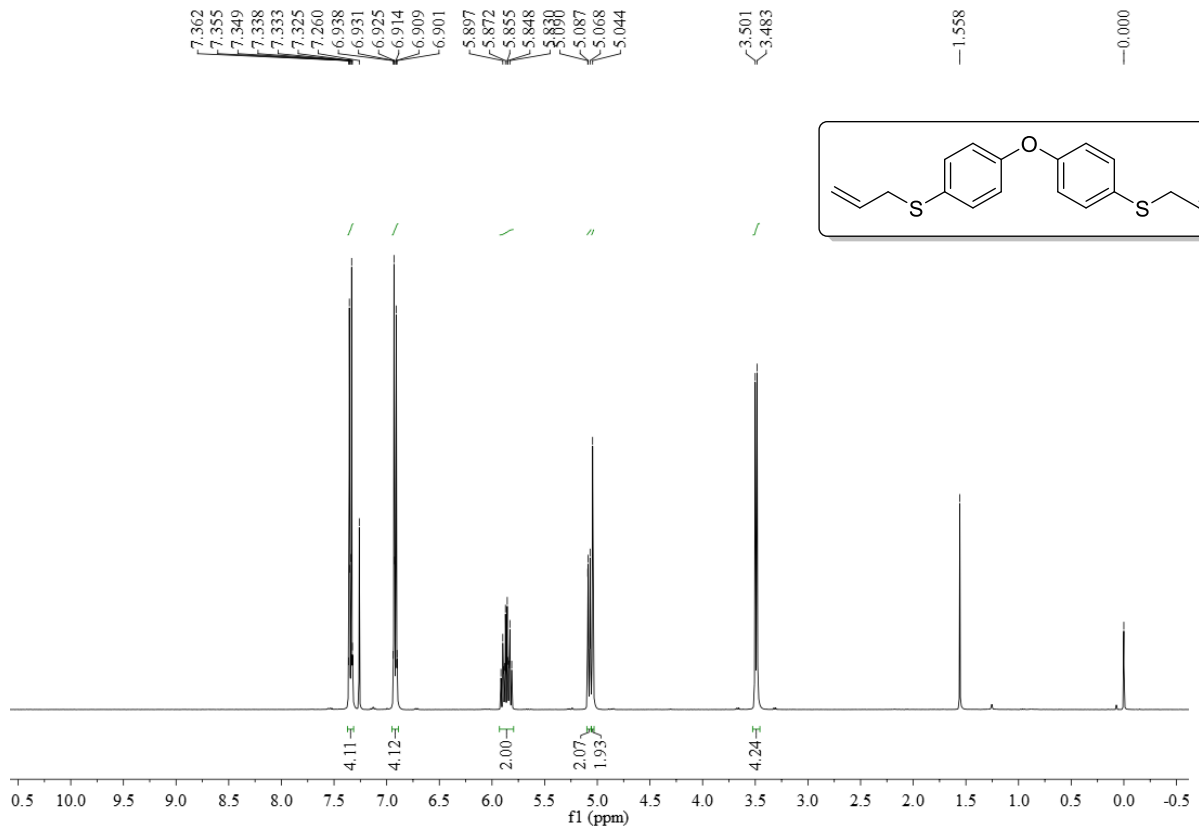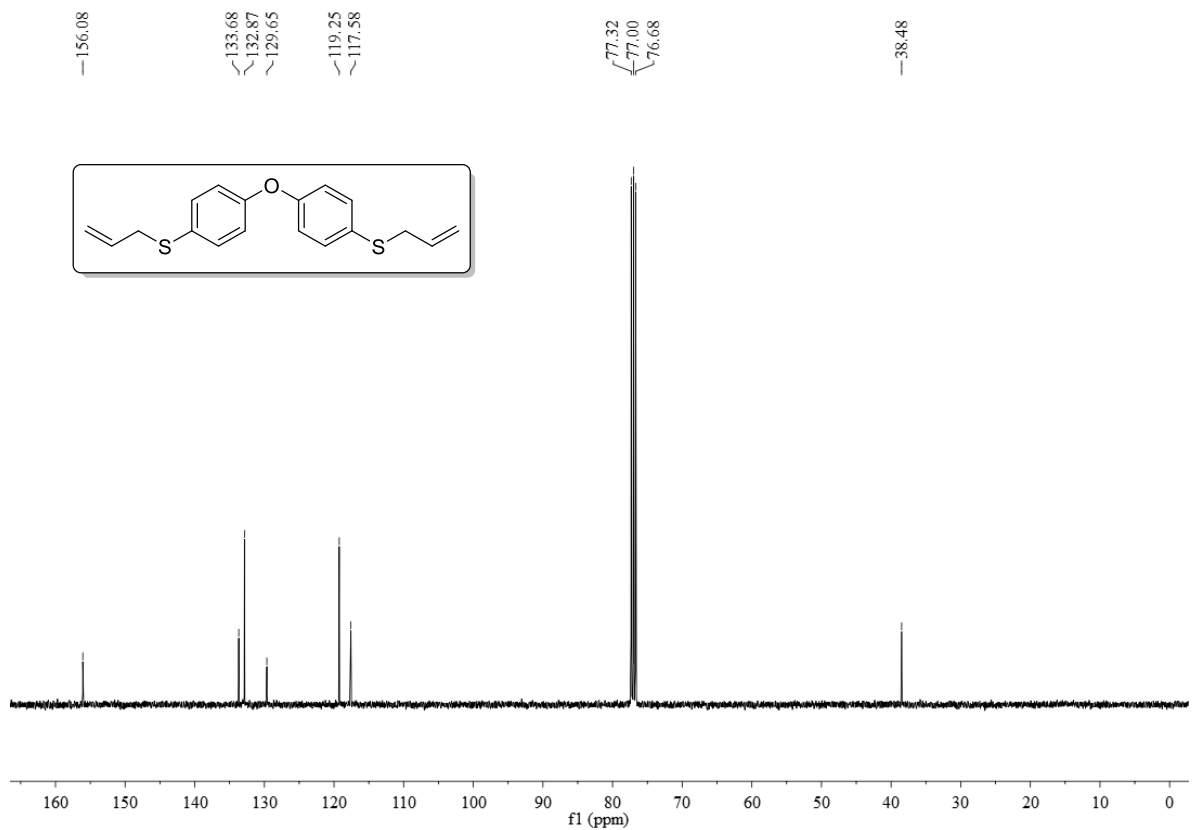

<sup>1</sup>H and <sup>13</sup>C NMR spectra of **4b**

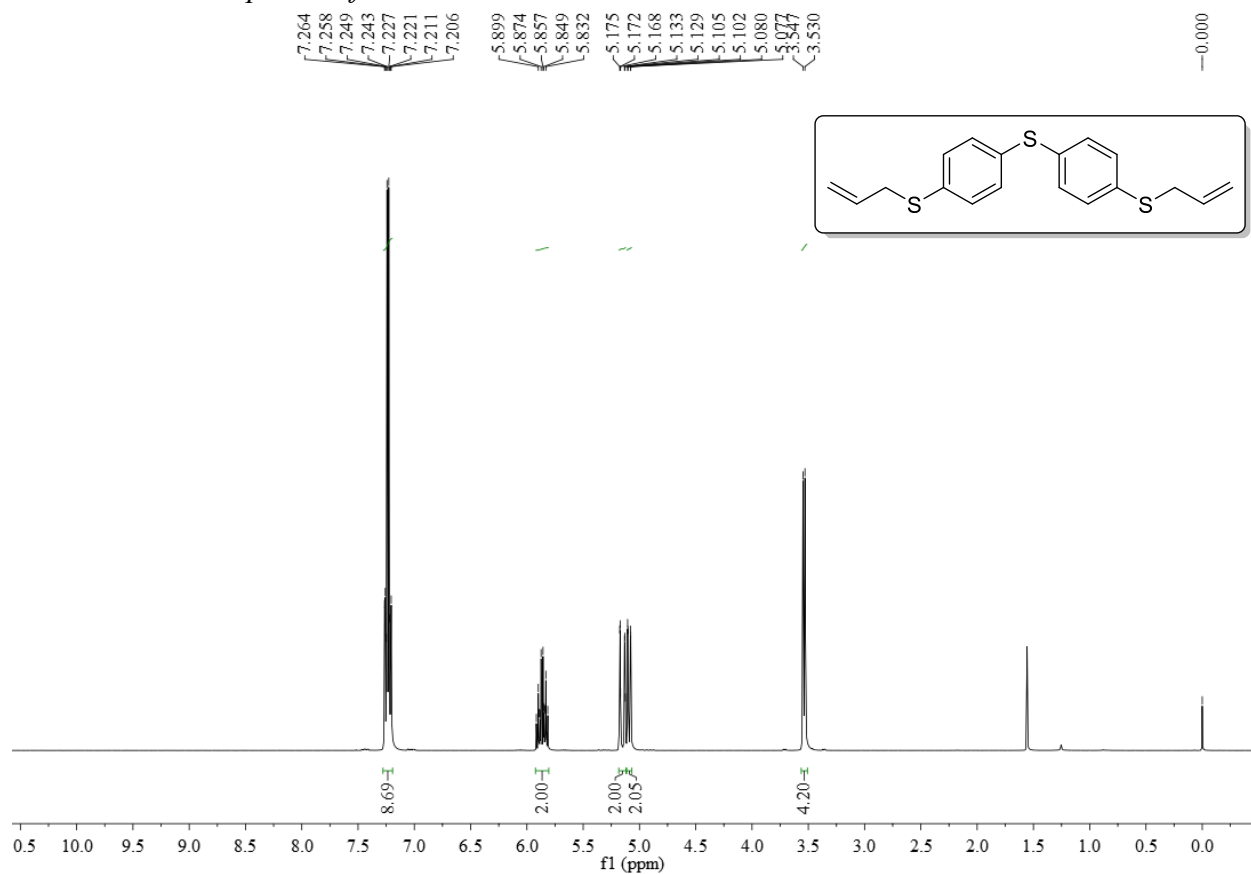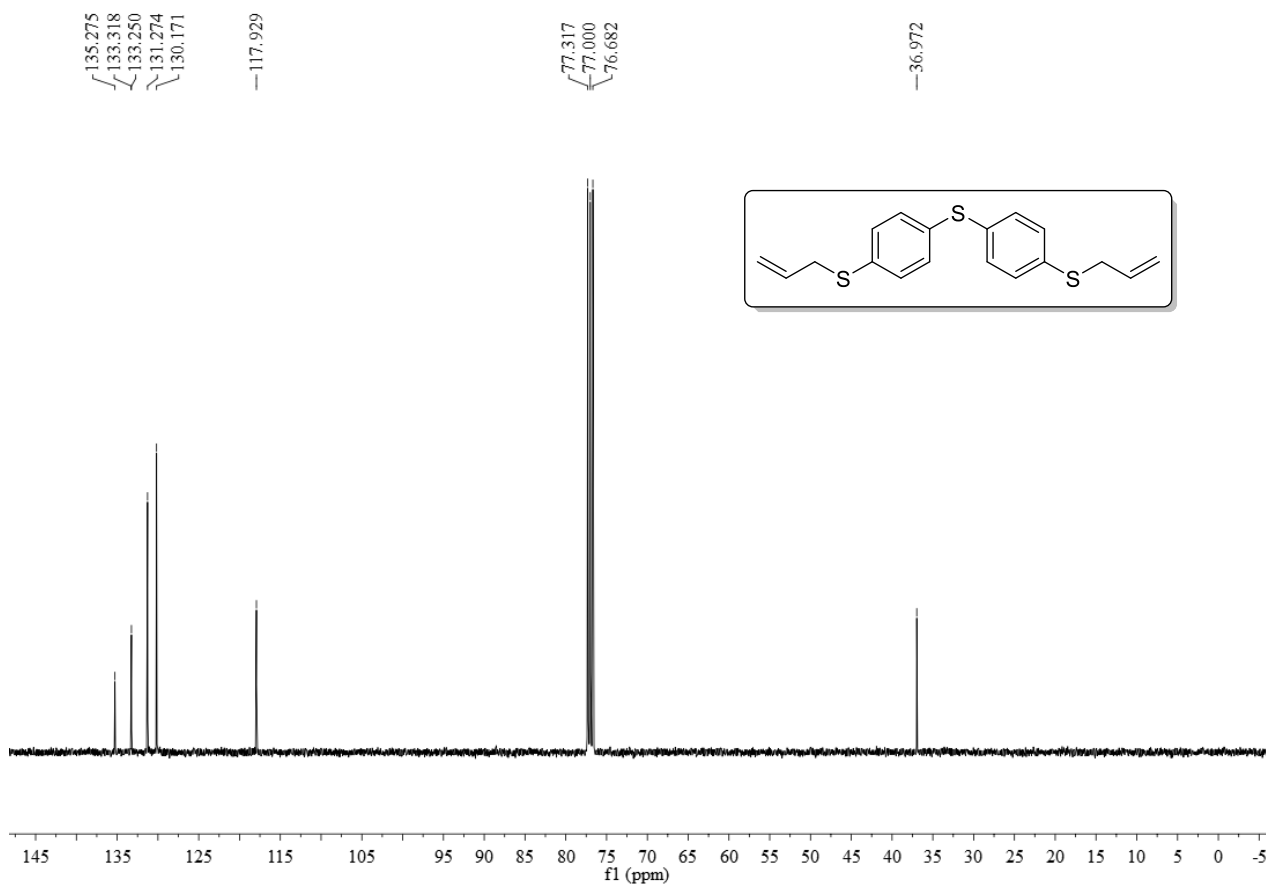

$^1\text{H}$  and  $^{13}\text{C}$  spectra of **4c**

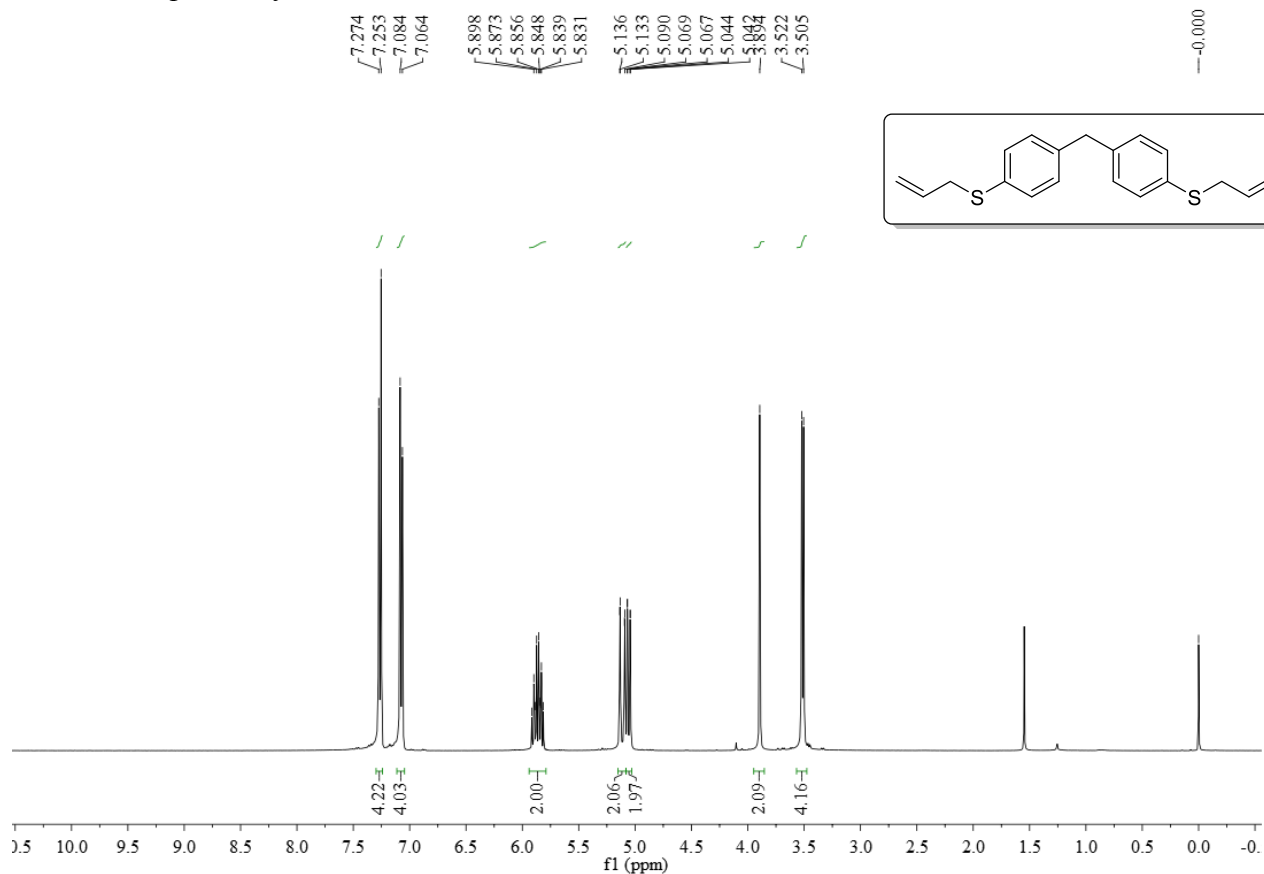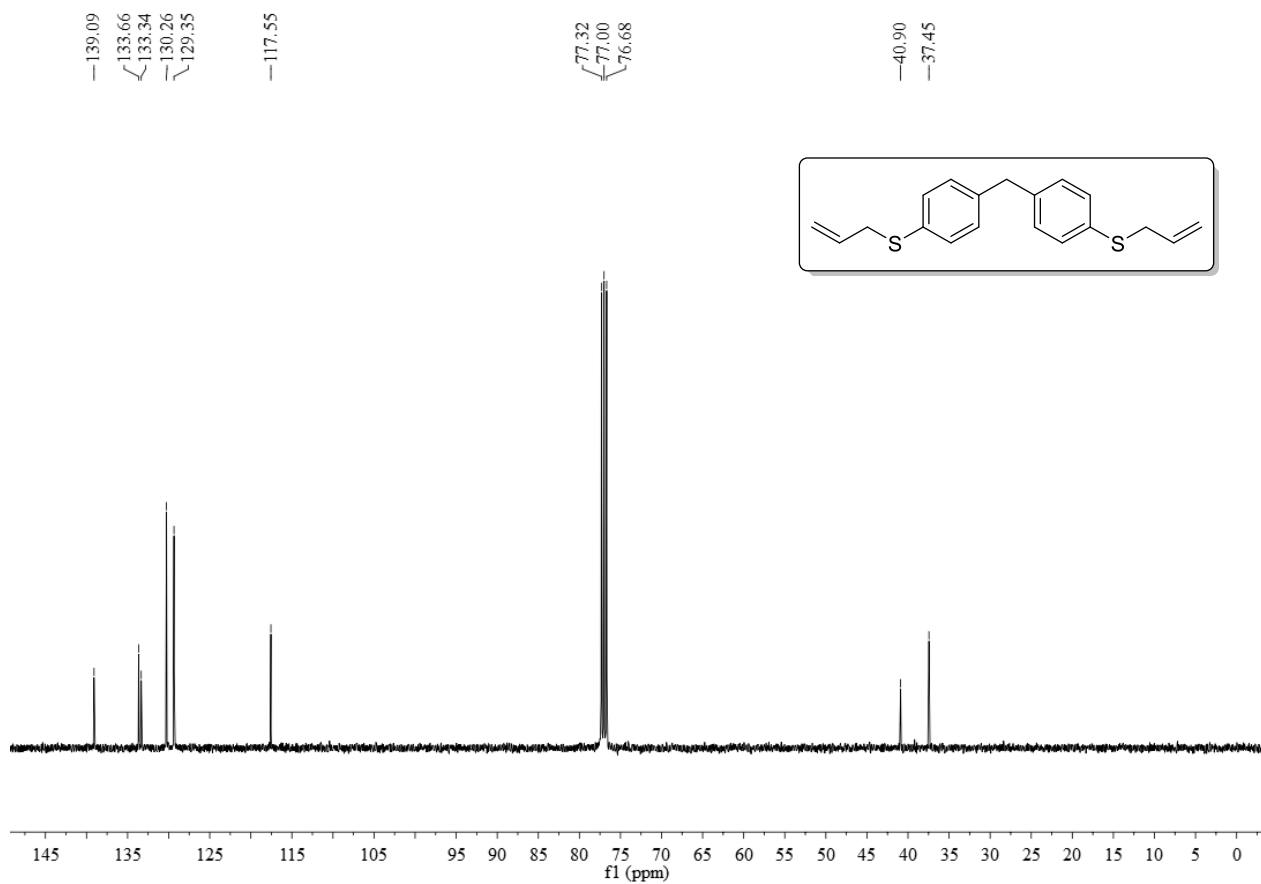

$^1\text{H}$  and  $^{13}\text{C}$  NMR spectra of **4d**

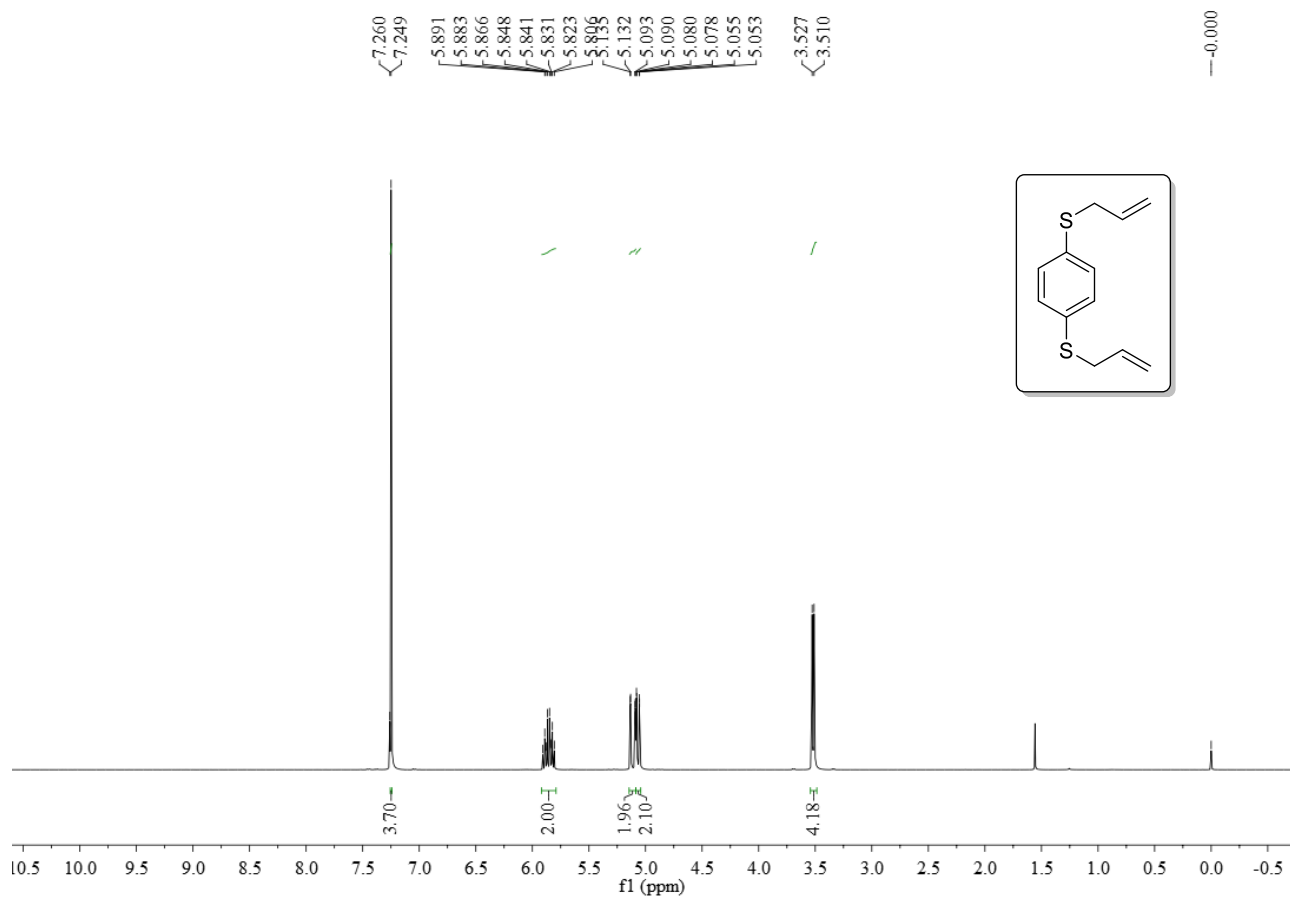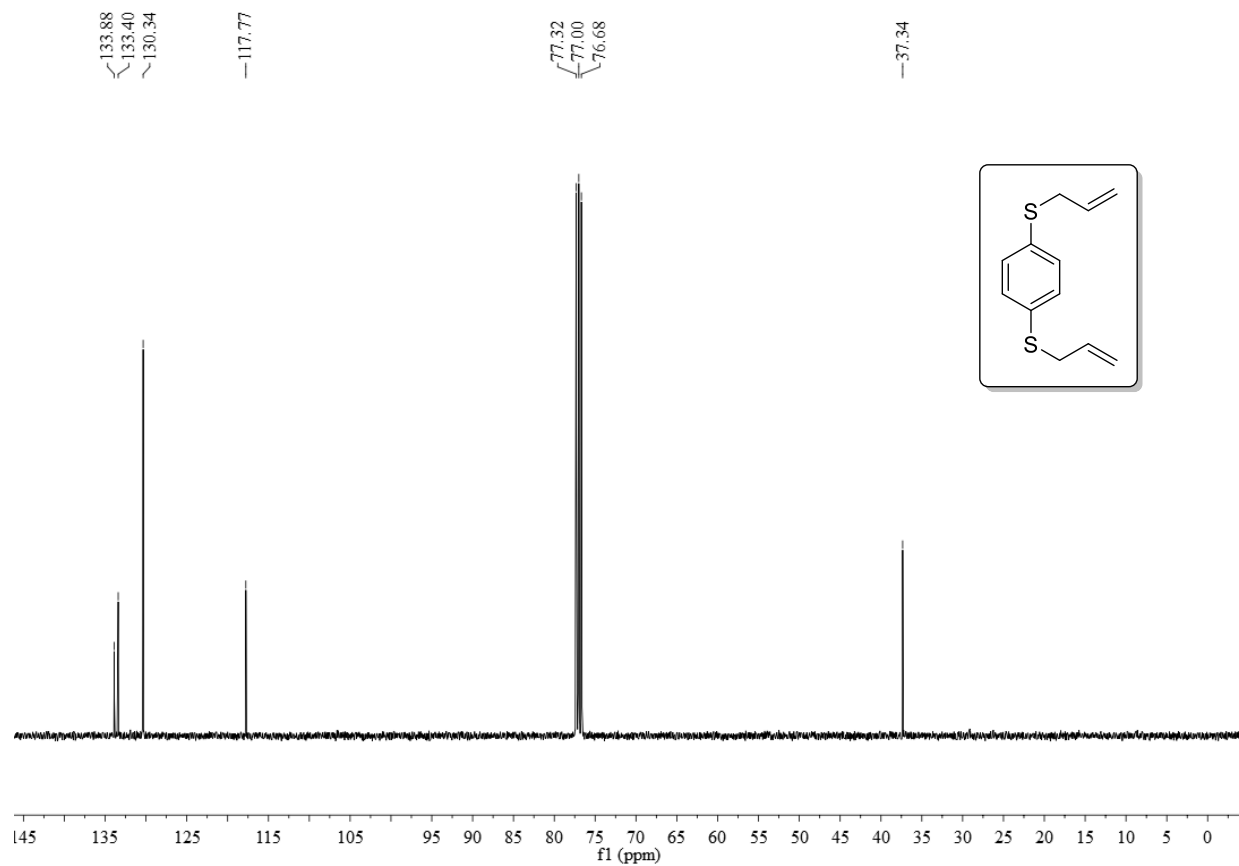

<sup>1</sup>H and <sup>13</sup>C NMR spectra of **4e**

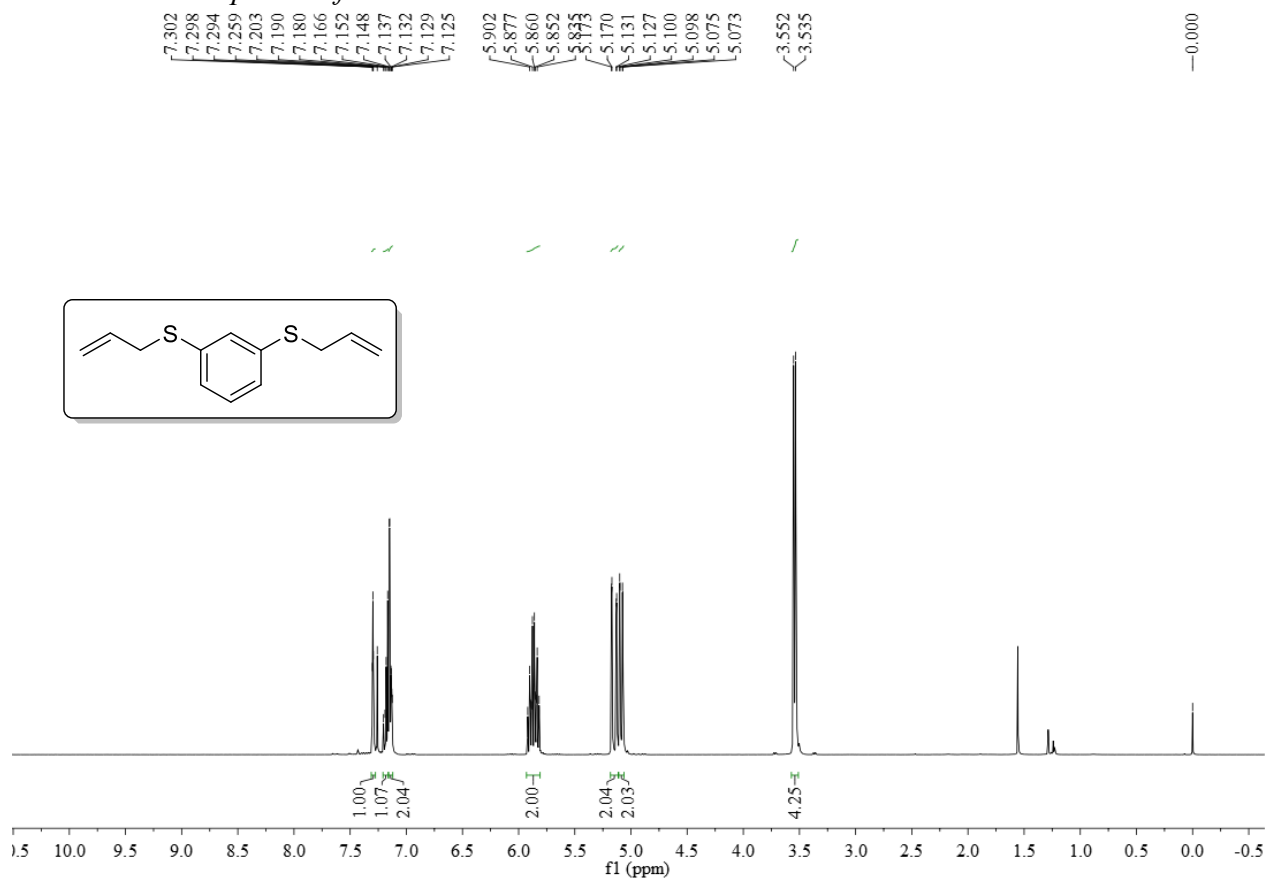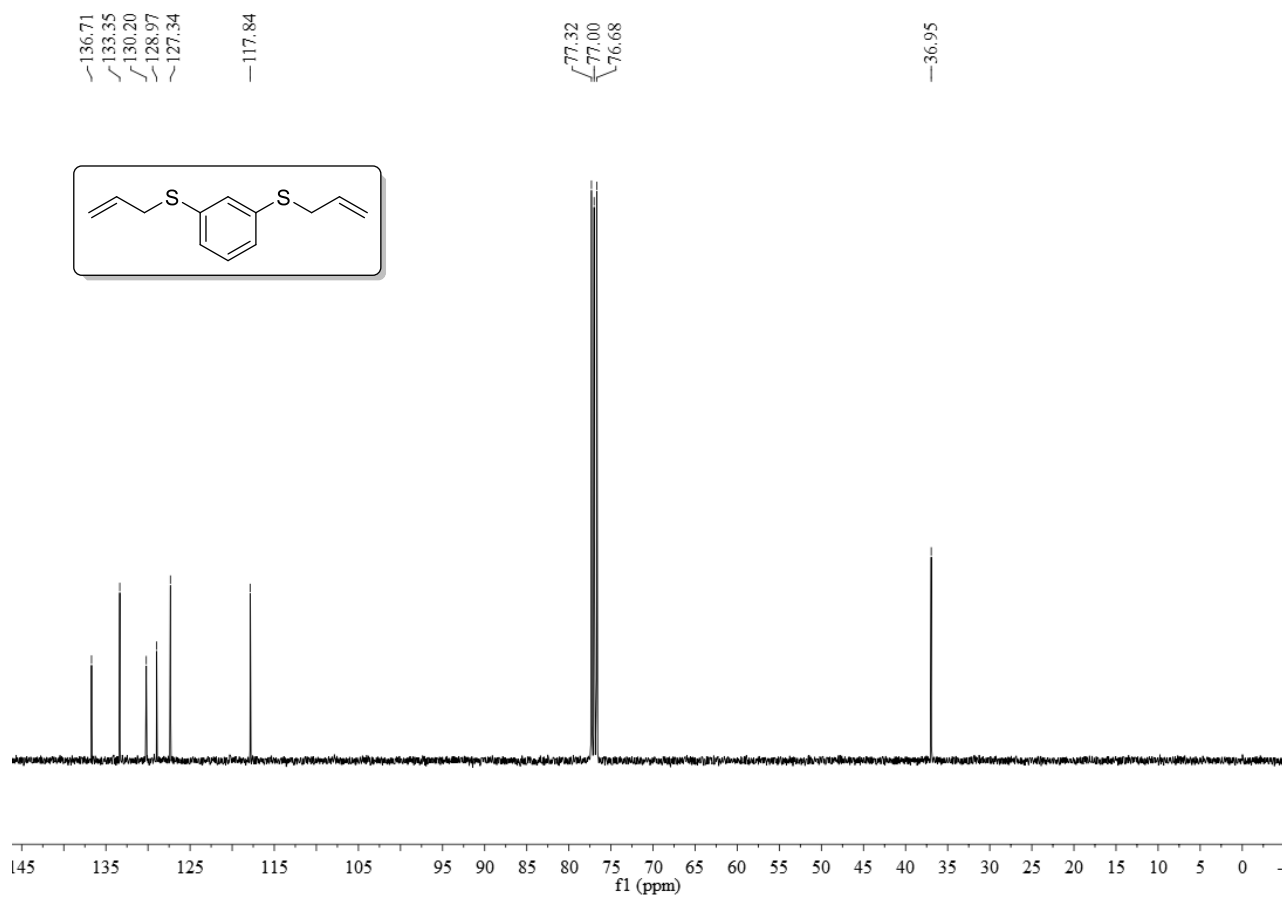

$^1\text{H}$  and  $^{13}\text{C}$  NMR spectra of **5a**

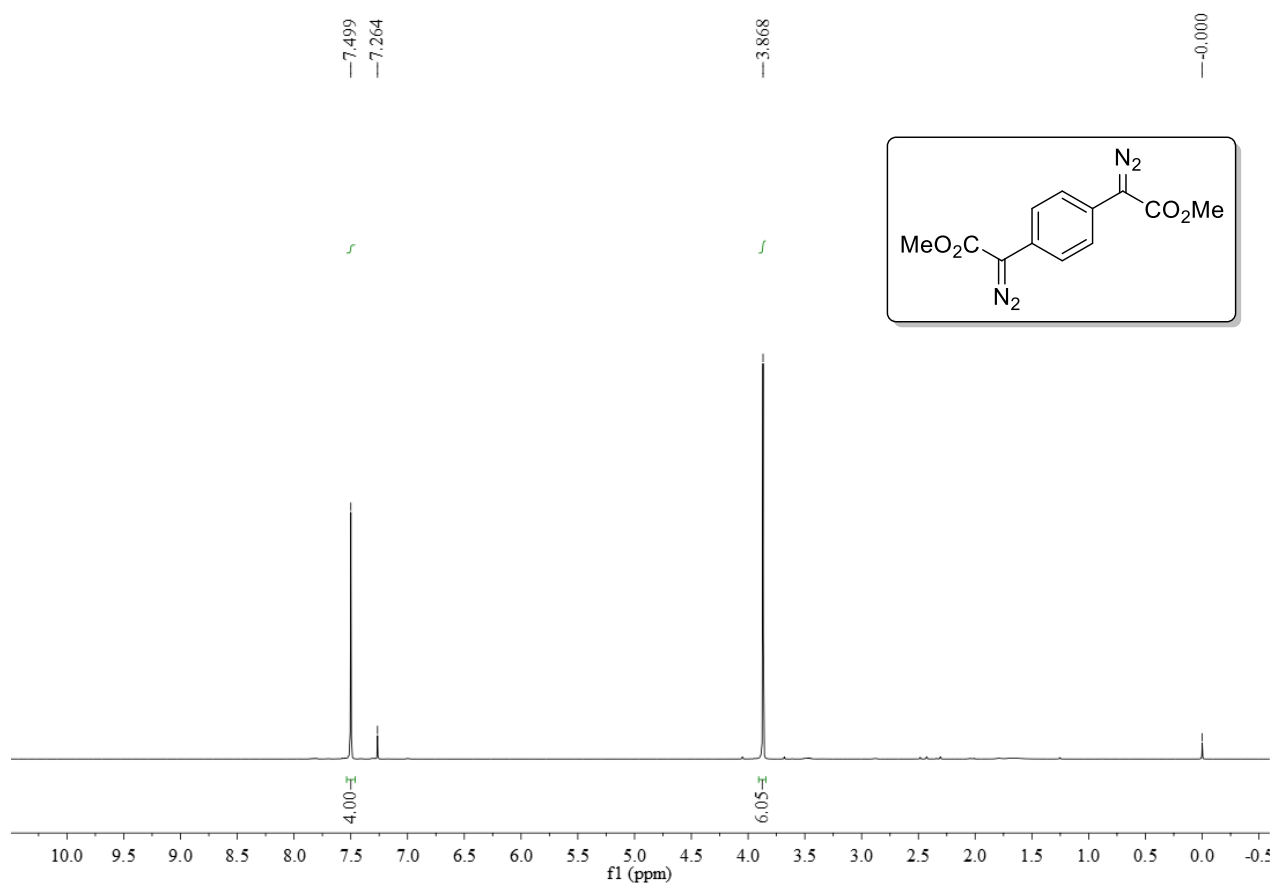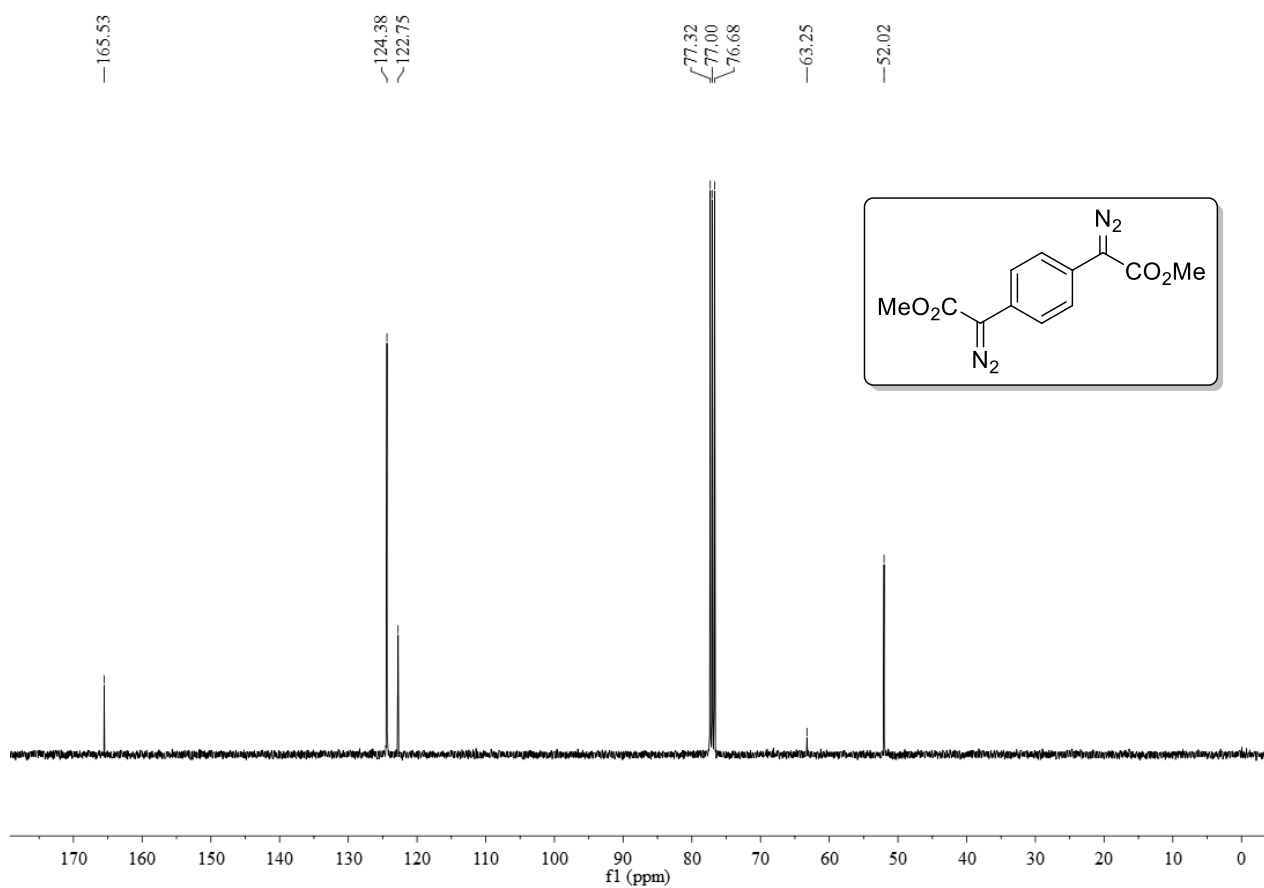

$^1\text{H}$  and  $^{13}\text{C}$  NMR spectra of **5b**

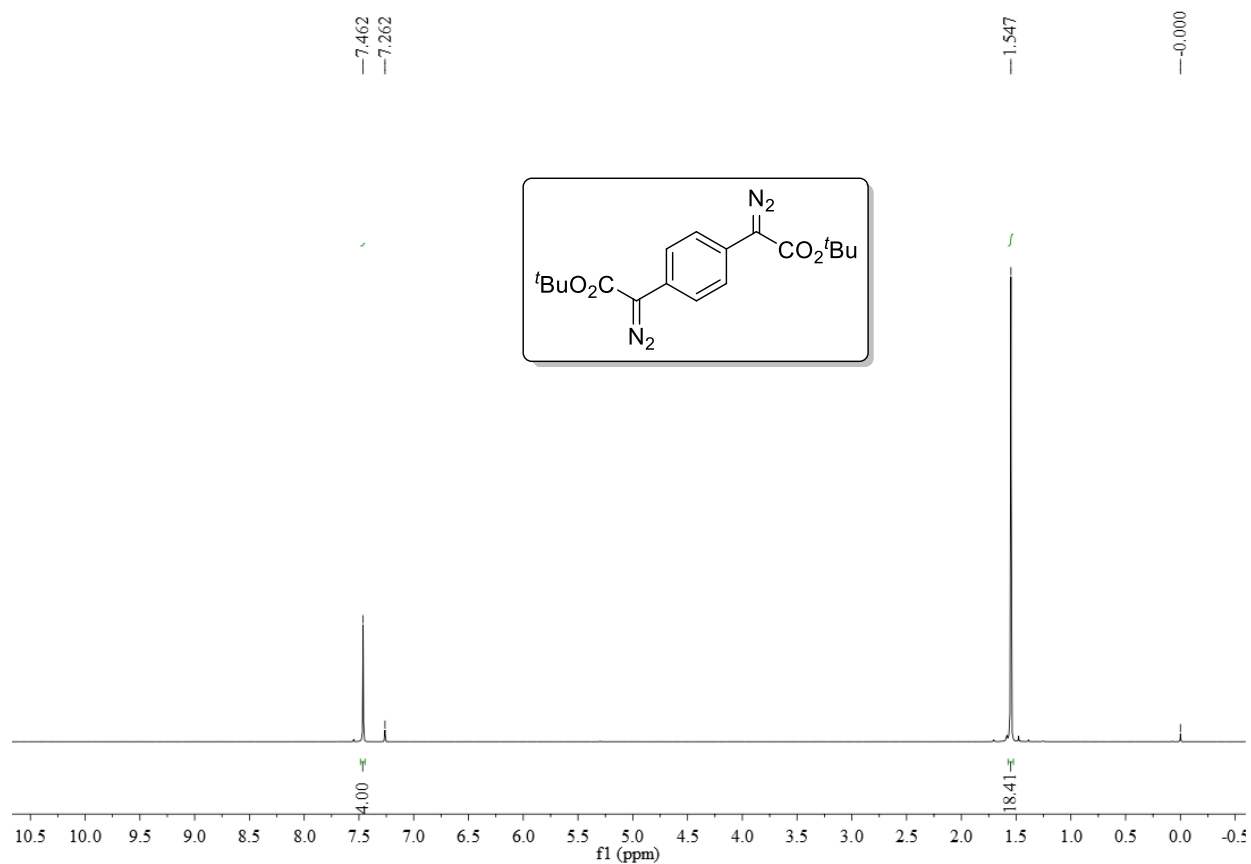

164.53

124.30  
123.04

82.11  
77.32  
77.00  
76.68

63.73

28.37

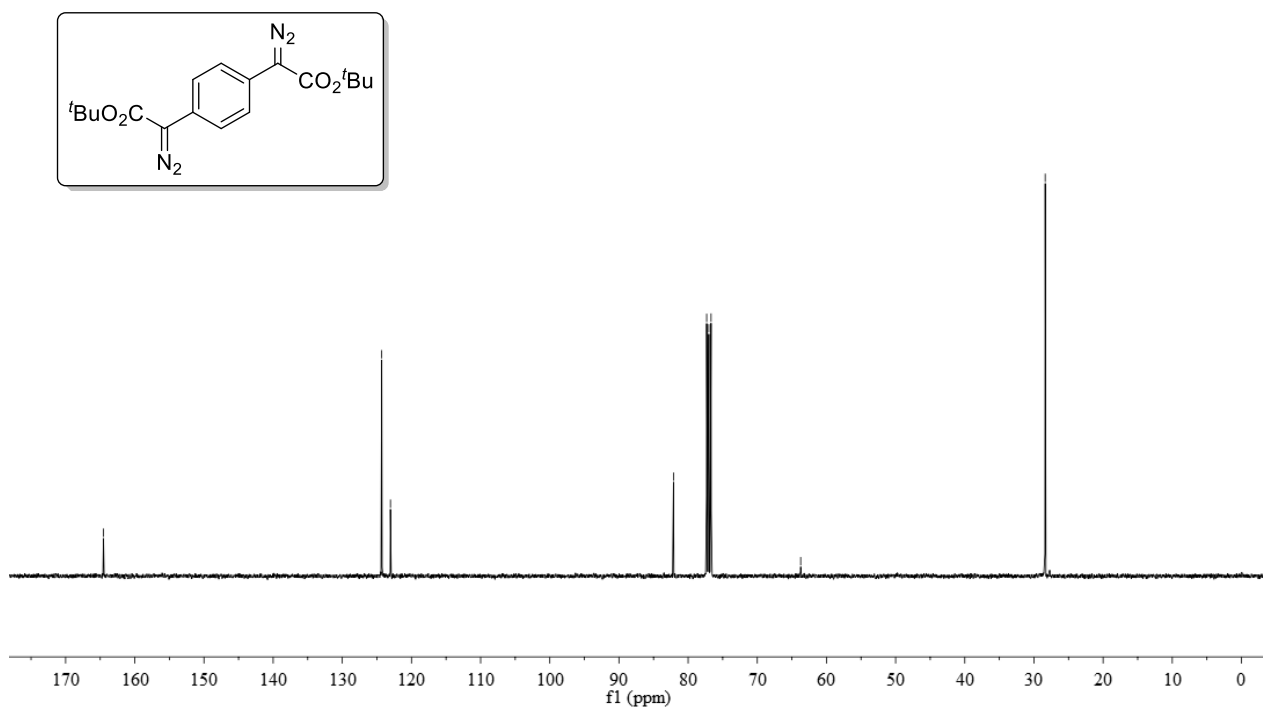



$^1\text{H}$  and  $^{13}\text{C}$  NMR spectra of **5c**

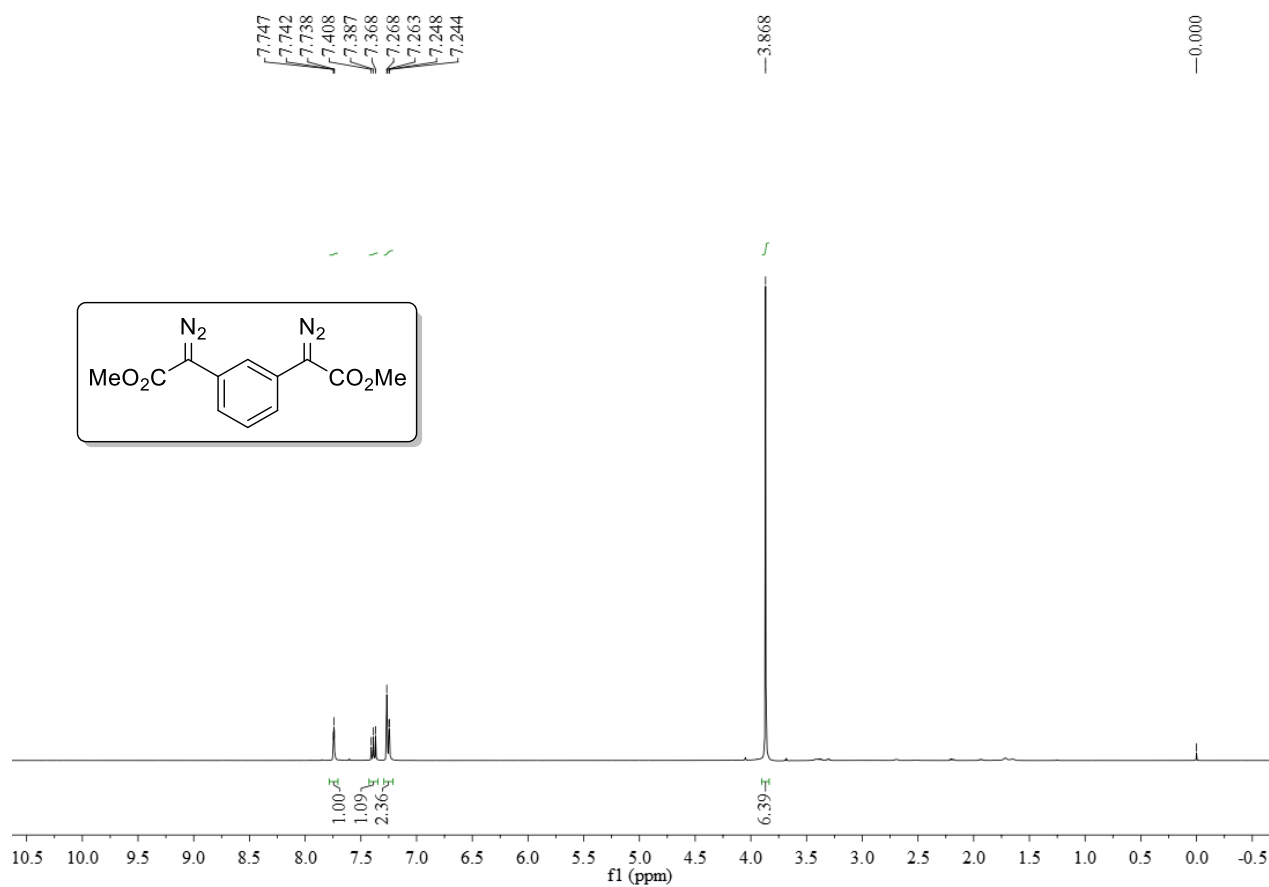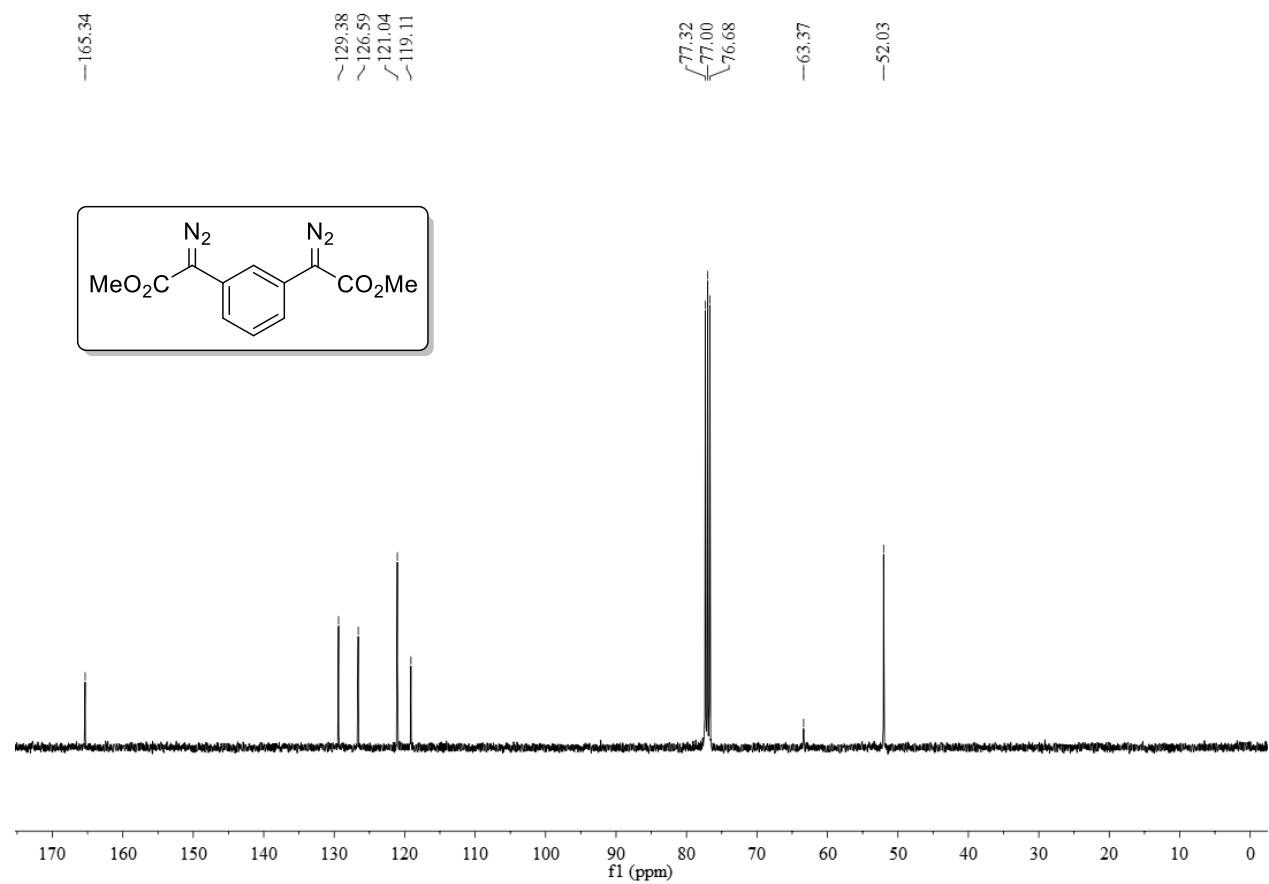

$^1\text{H}$  and  $^{13}\text{C}$  NMR spectra of **5d**

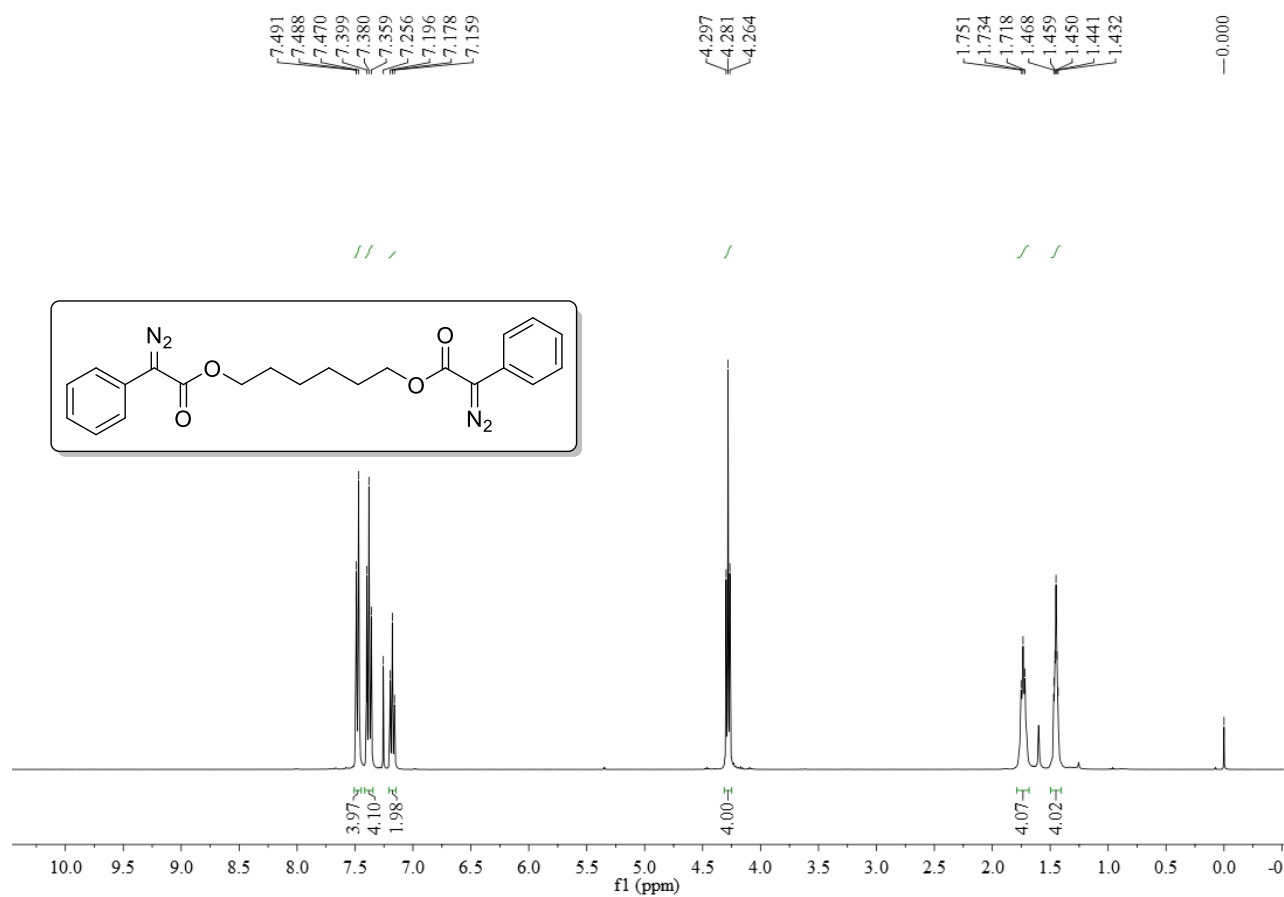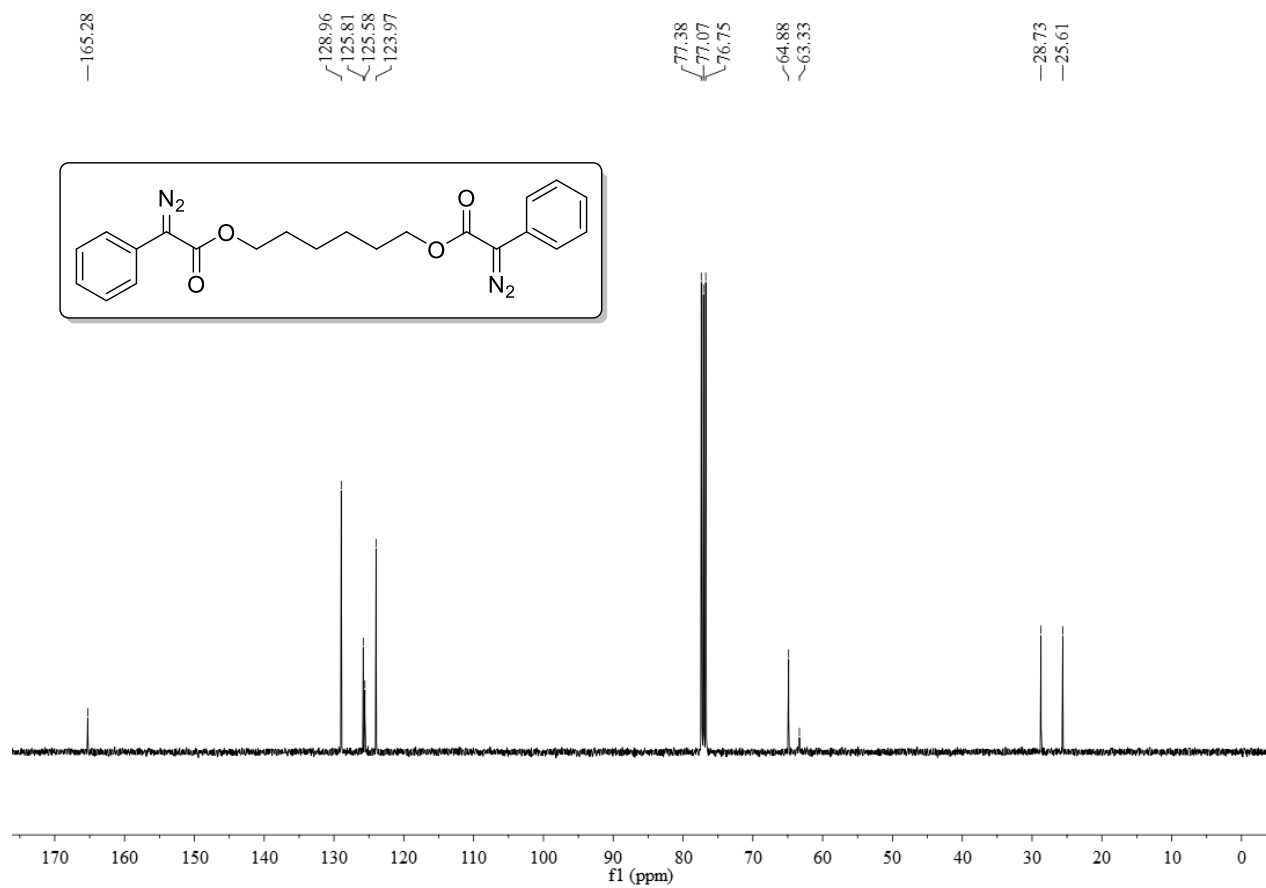

$^1\text{H}$  and  $^{13}\text{C}$  NMR spectra of **5e**

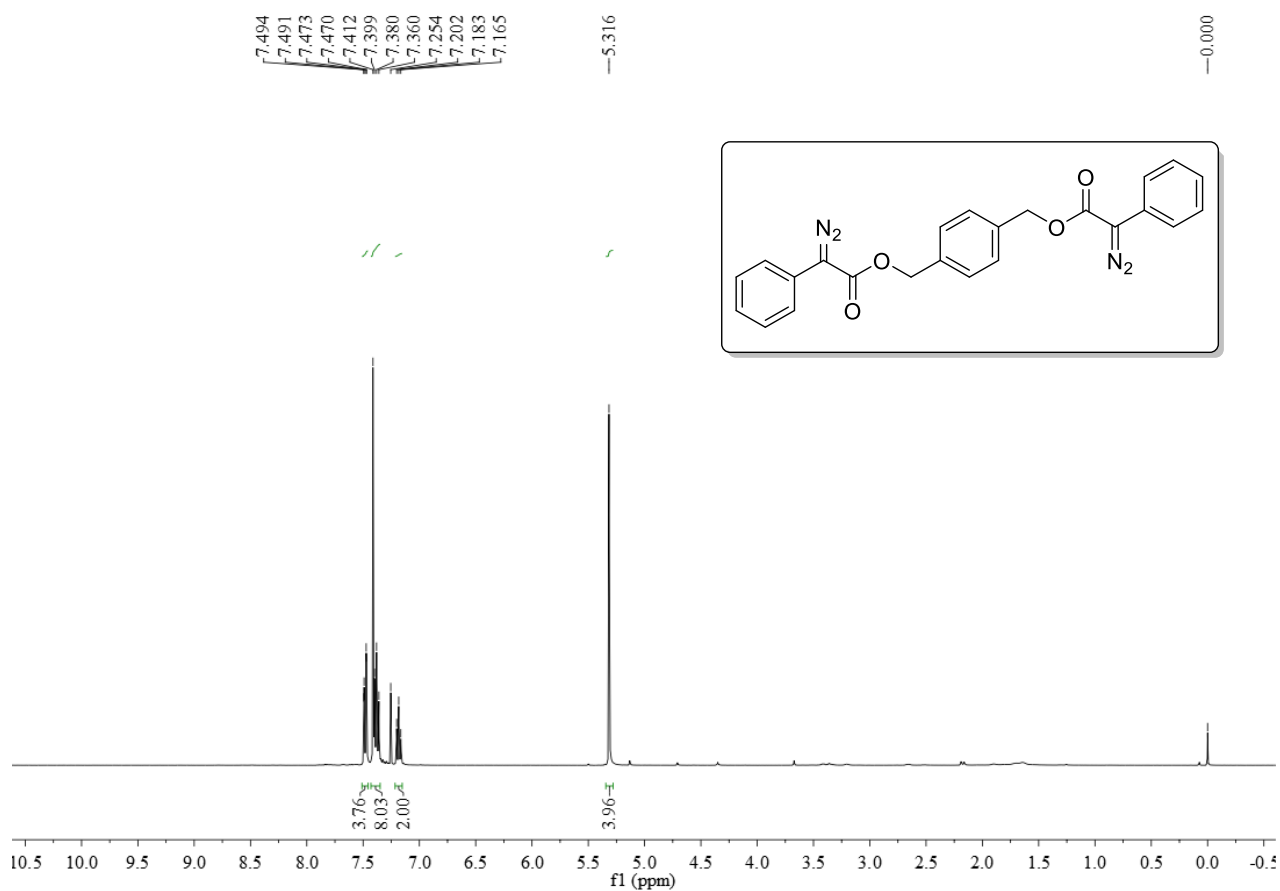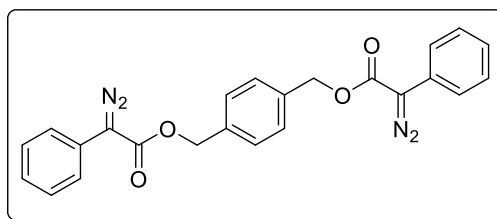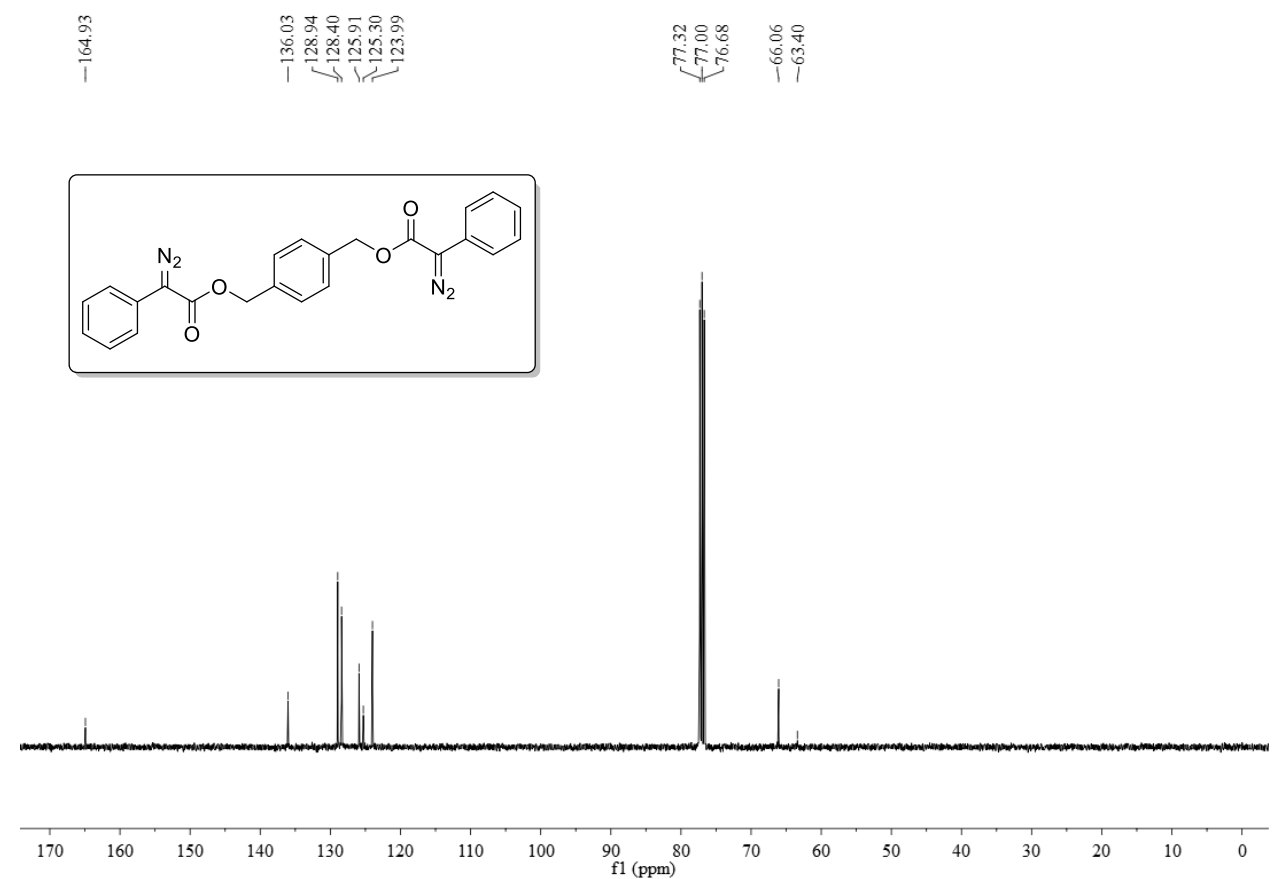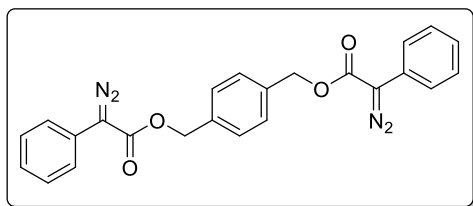

$^1\text{H}$  and  $^{13}\text{C}$  NMR spectra of **6**

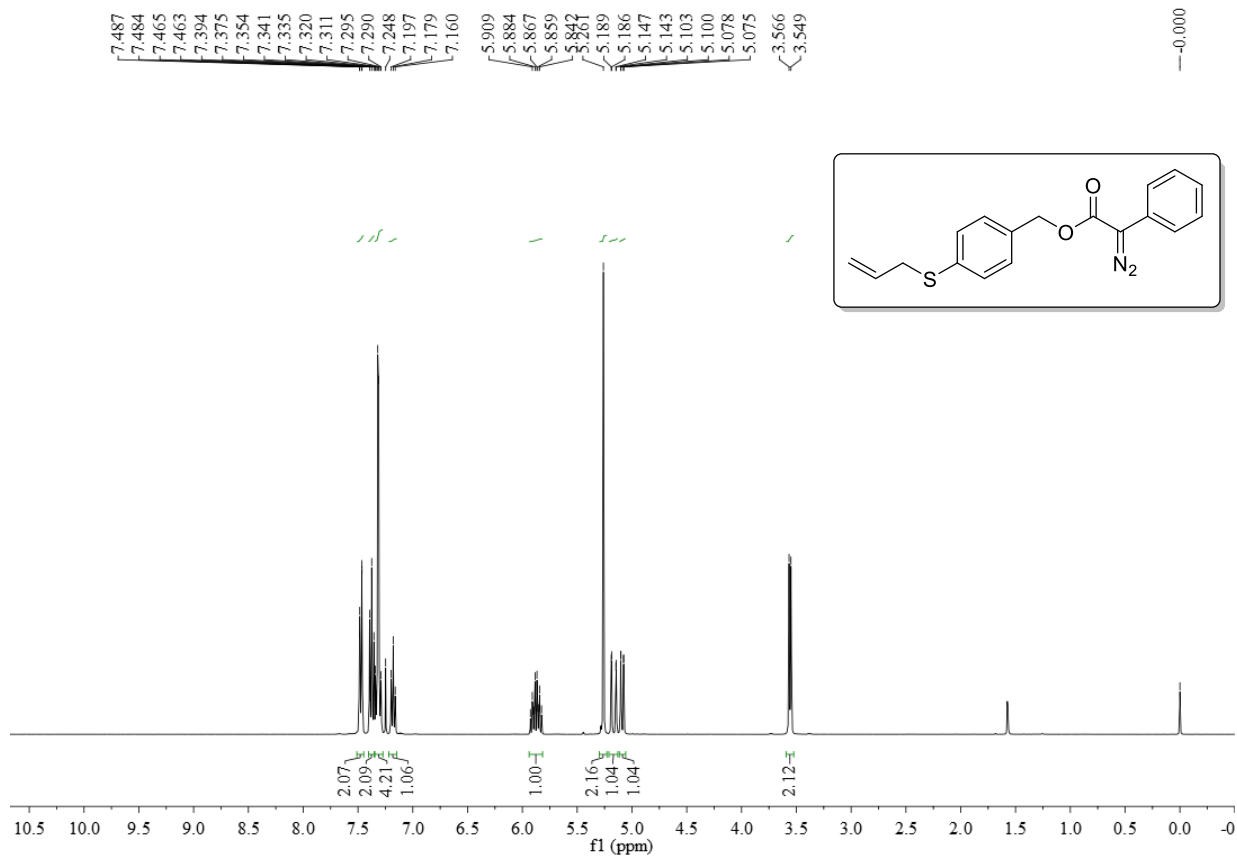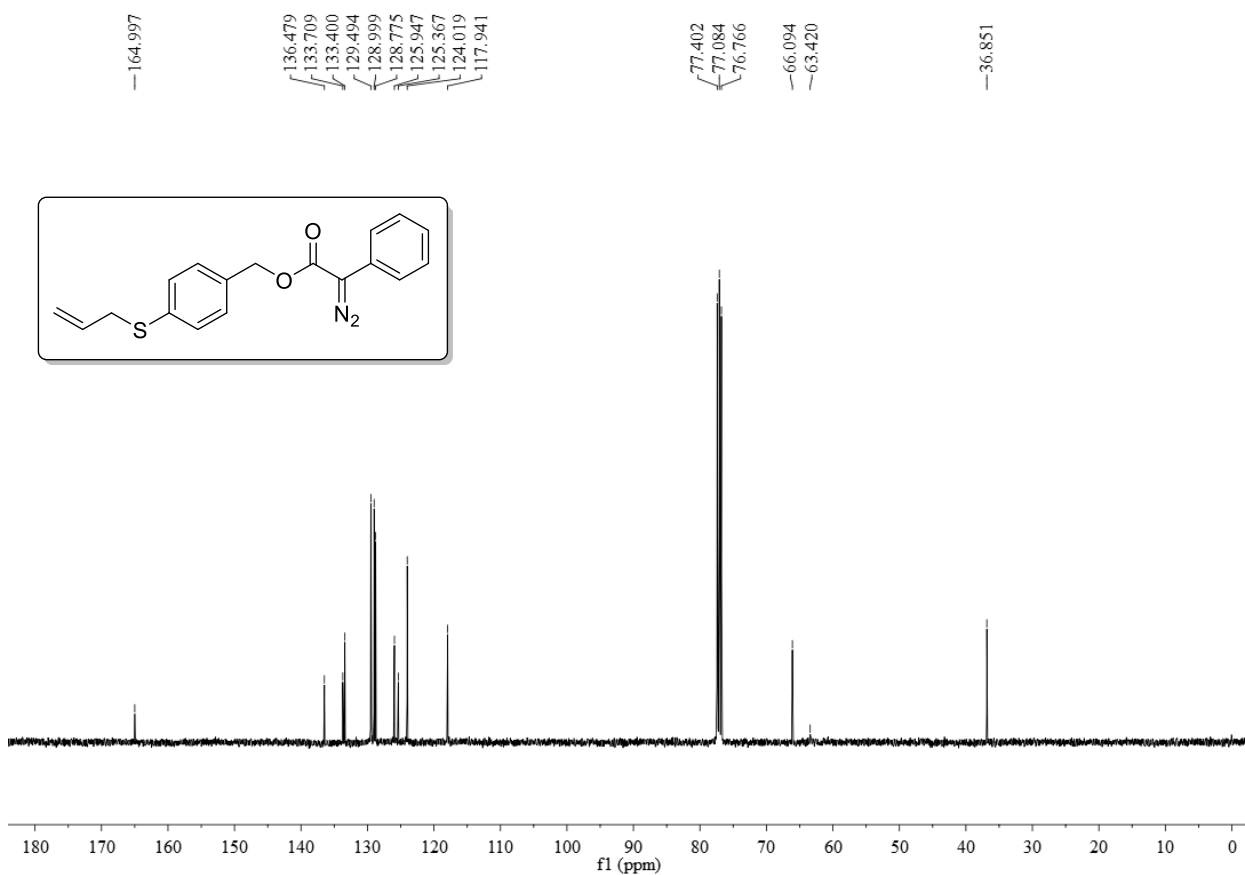

$^1\text{H}$  and  $^{13}\text{C}$  NMR spectra of **7**

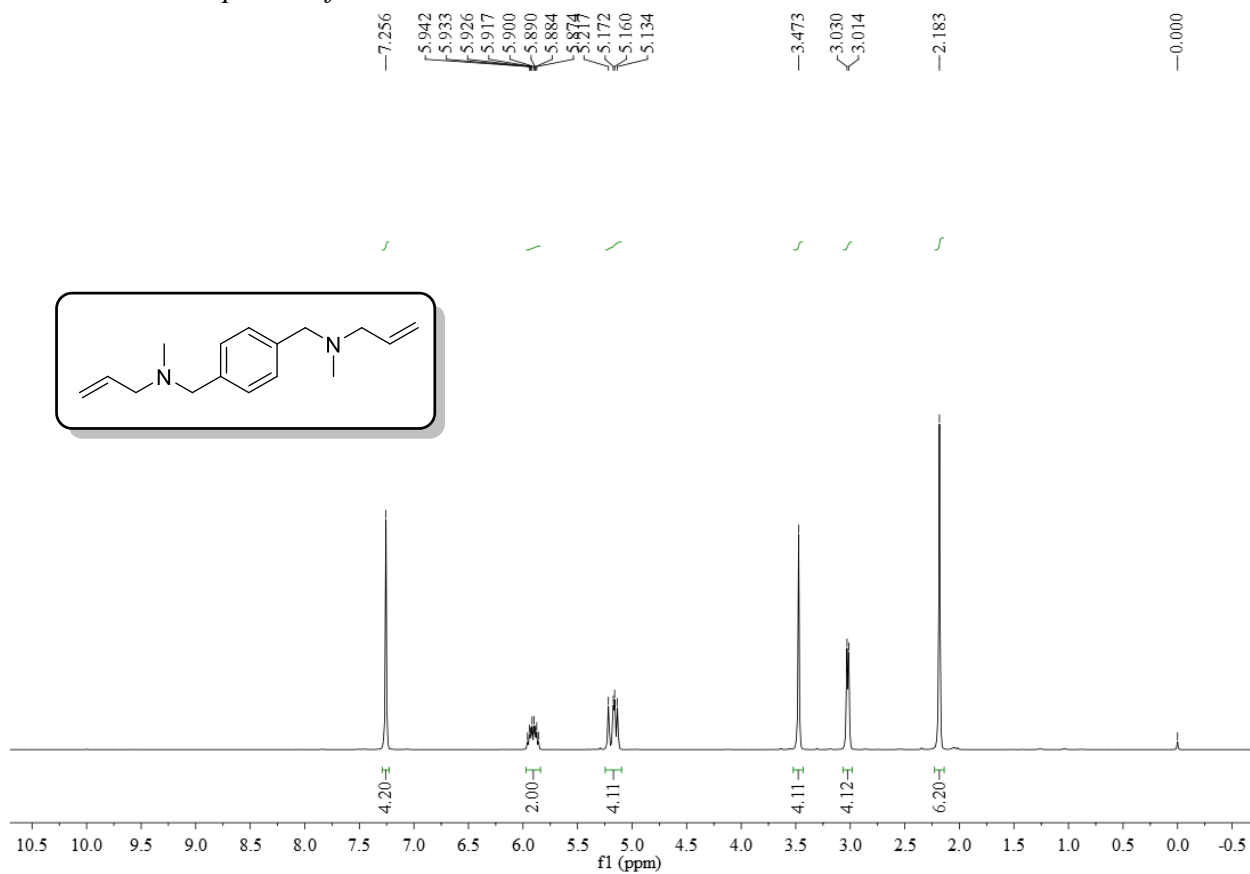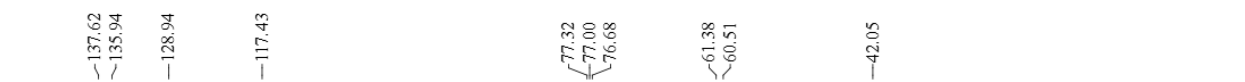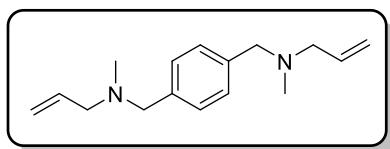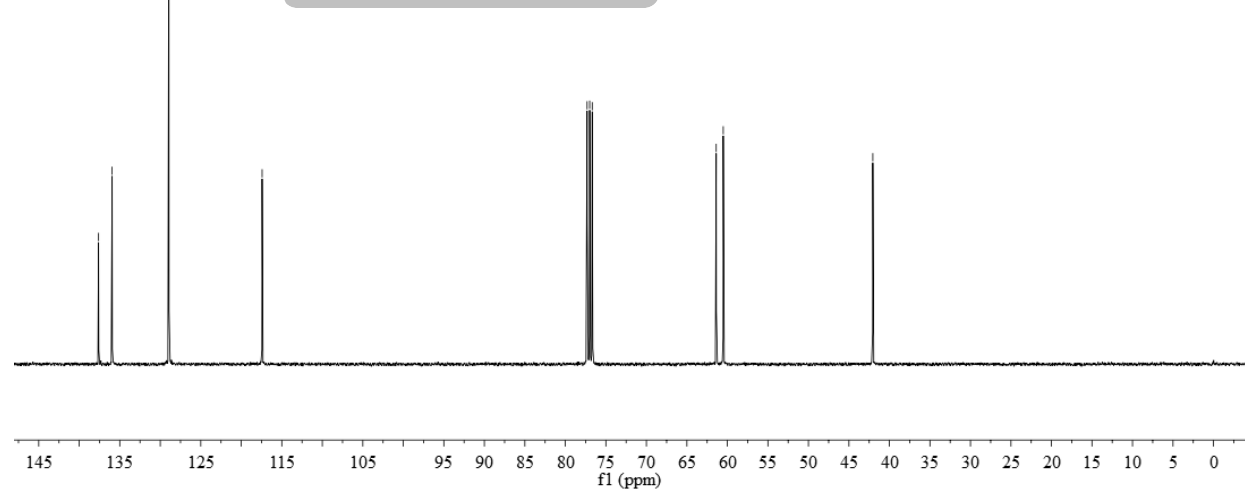

## 2) $^1\text{H}$ and $^{13}\text{C}$ NMR spectra of the polymer products

$^1\text{H}$  and  $^{13}\text{C}$  NMR spectra of **PI**

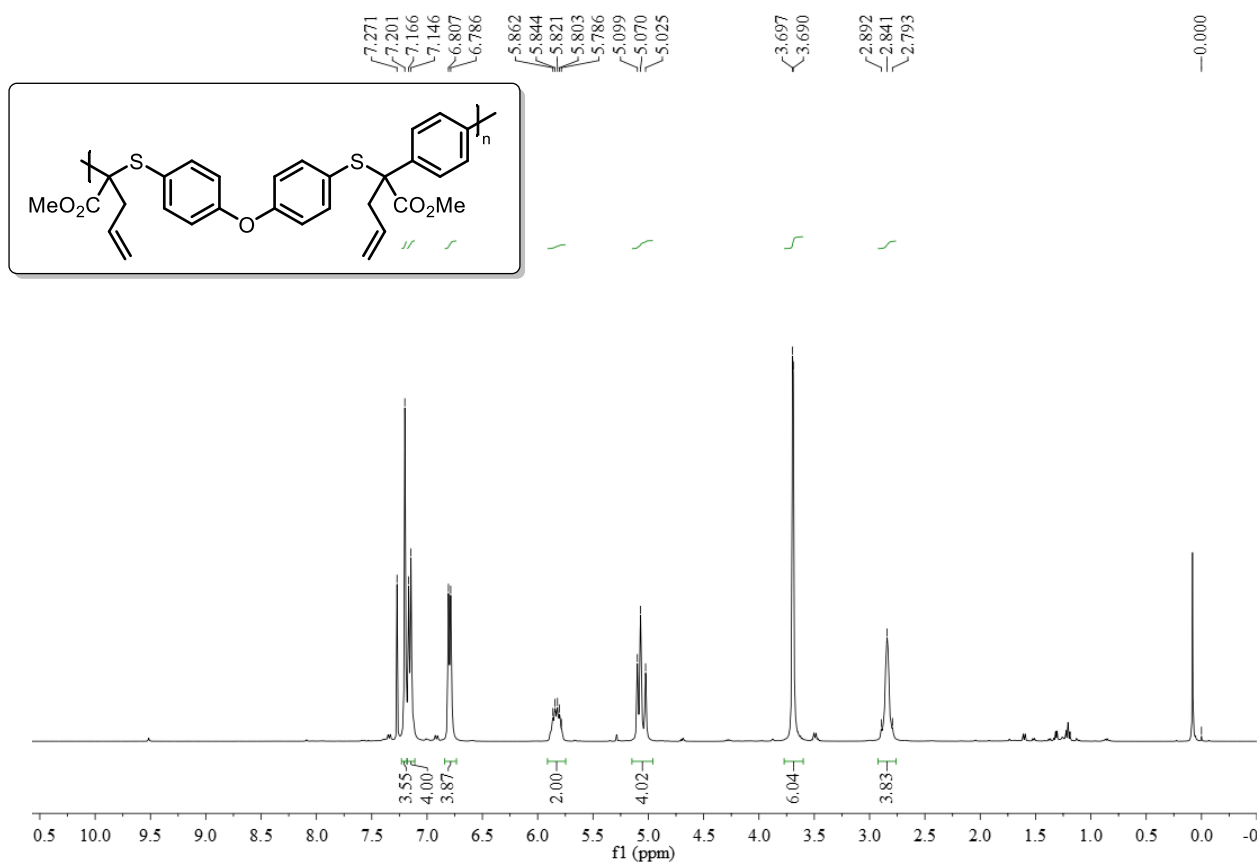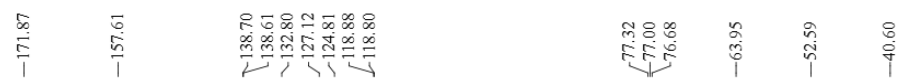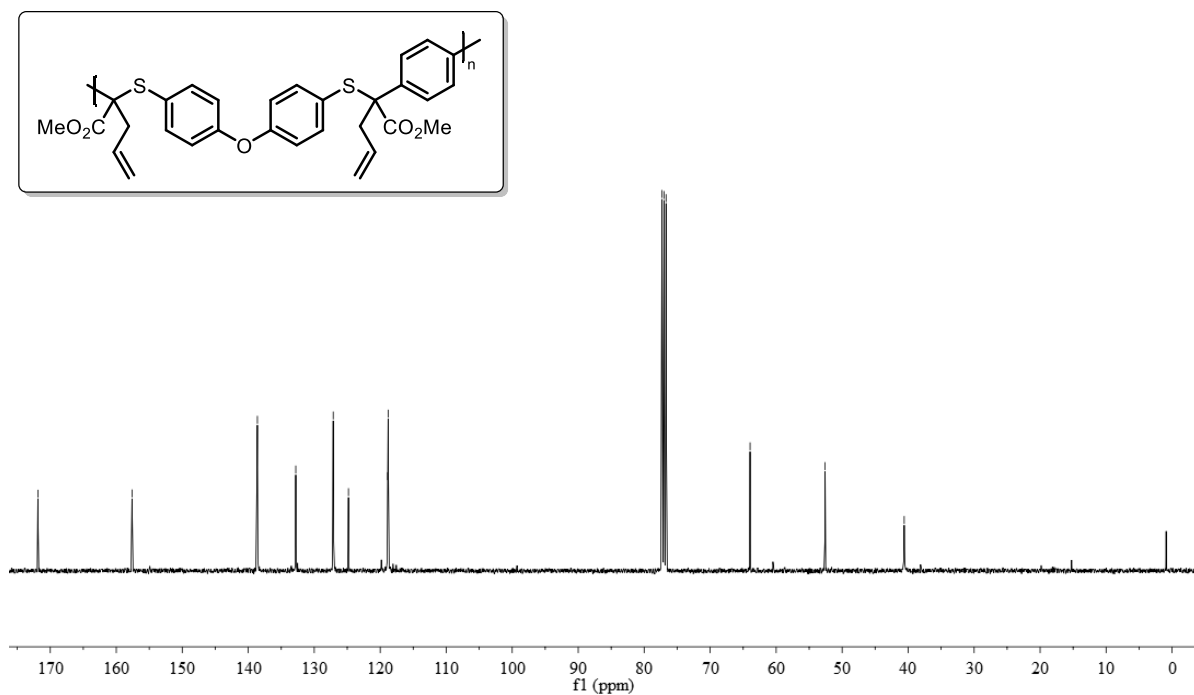

$^1\text{H}$  and  $^{13}\text{C}$  NMR spectra of **P2**

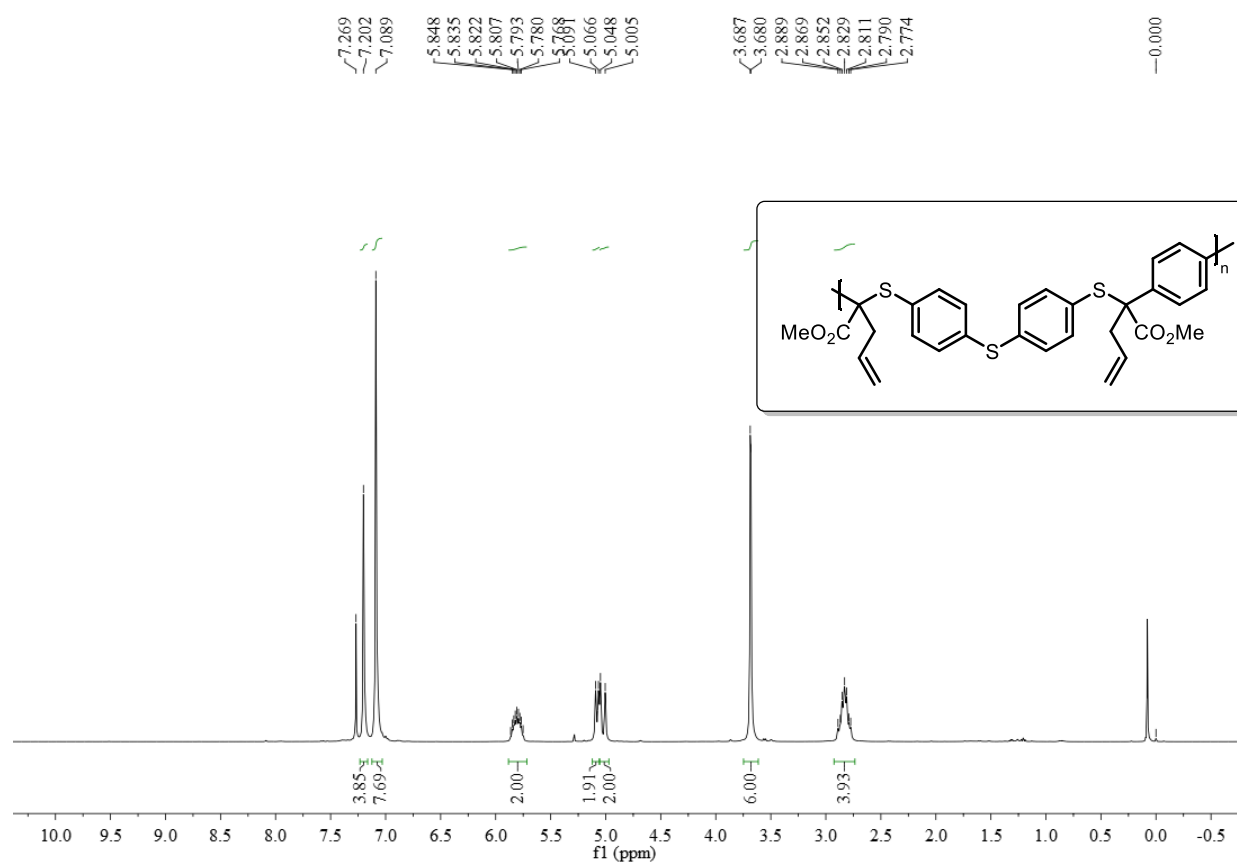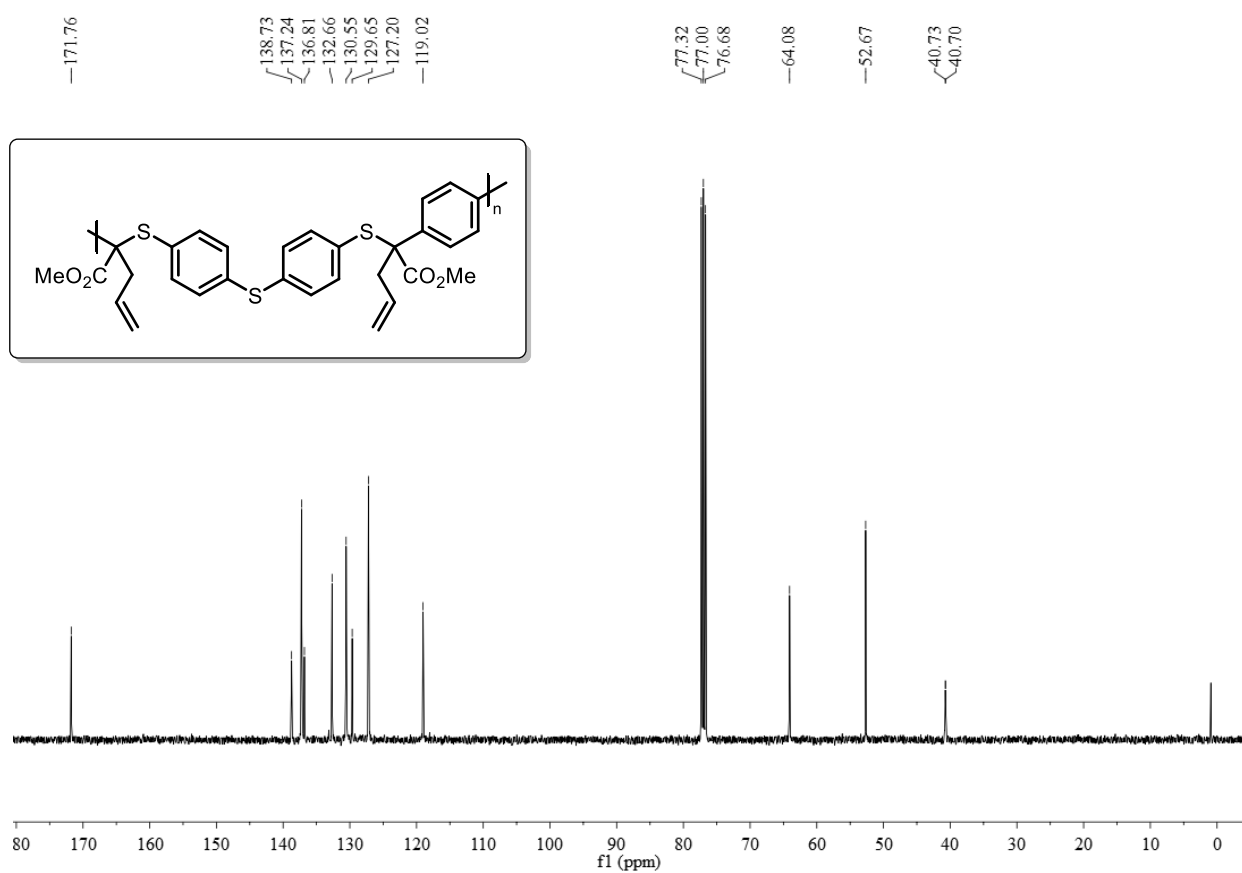

$^1\text{H}$  and  $^{13}\text{C}$  NMR spectra of **P3**

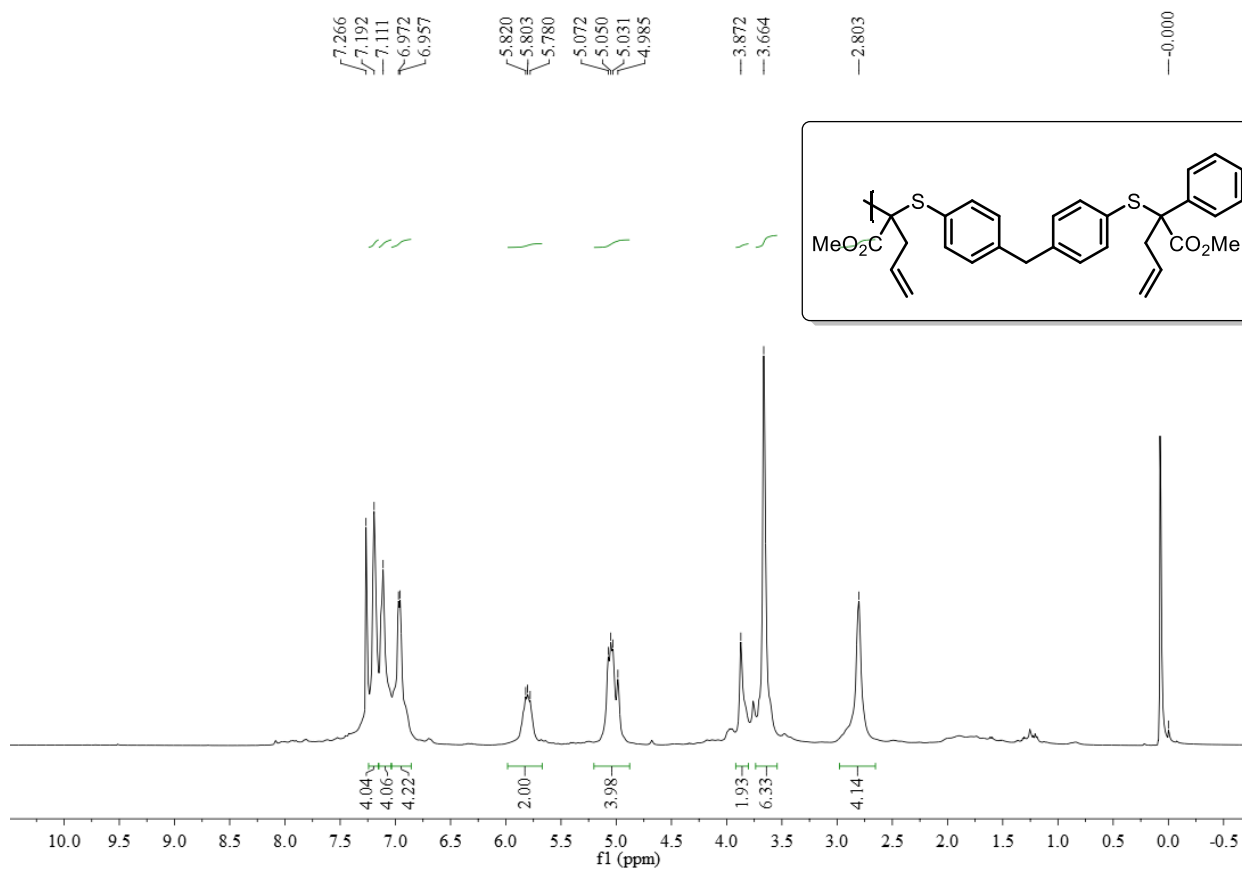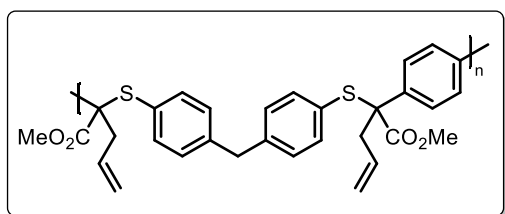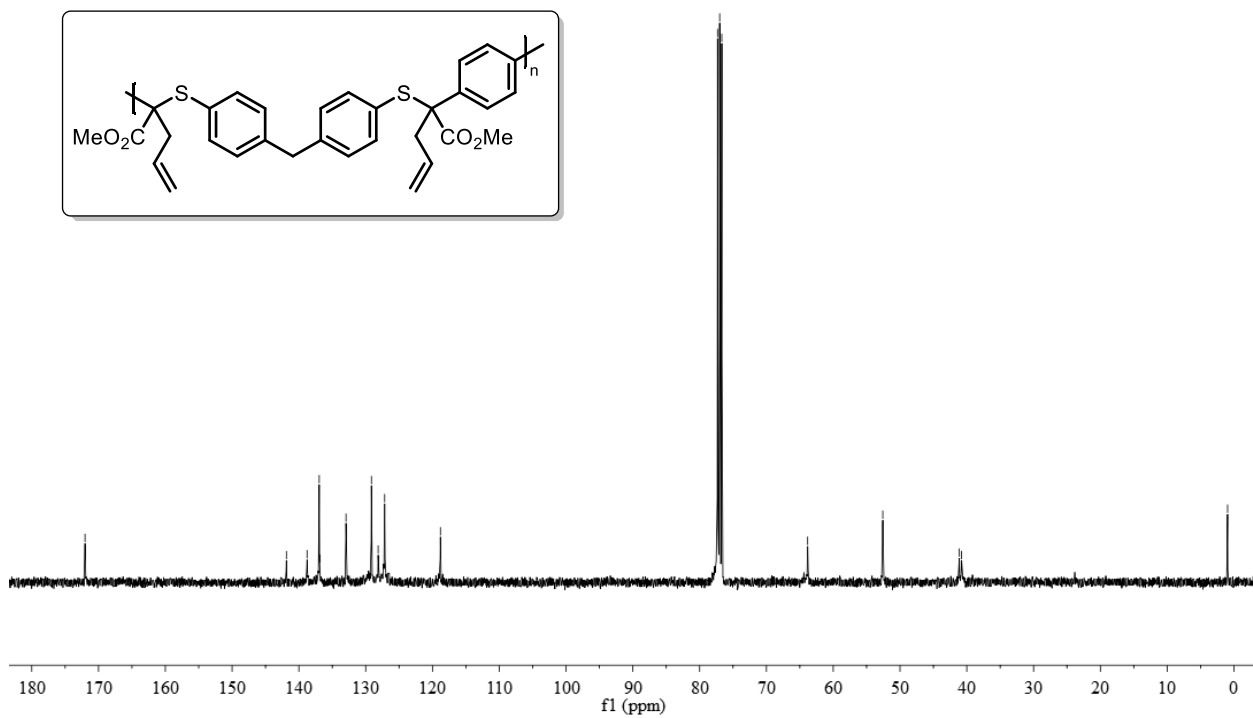



<sup>1</sup>H and <sup>13</sup>C NMR spectra of **P4**

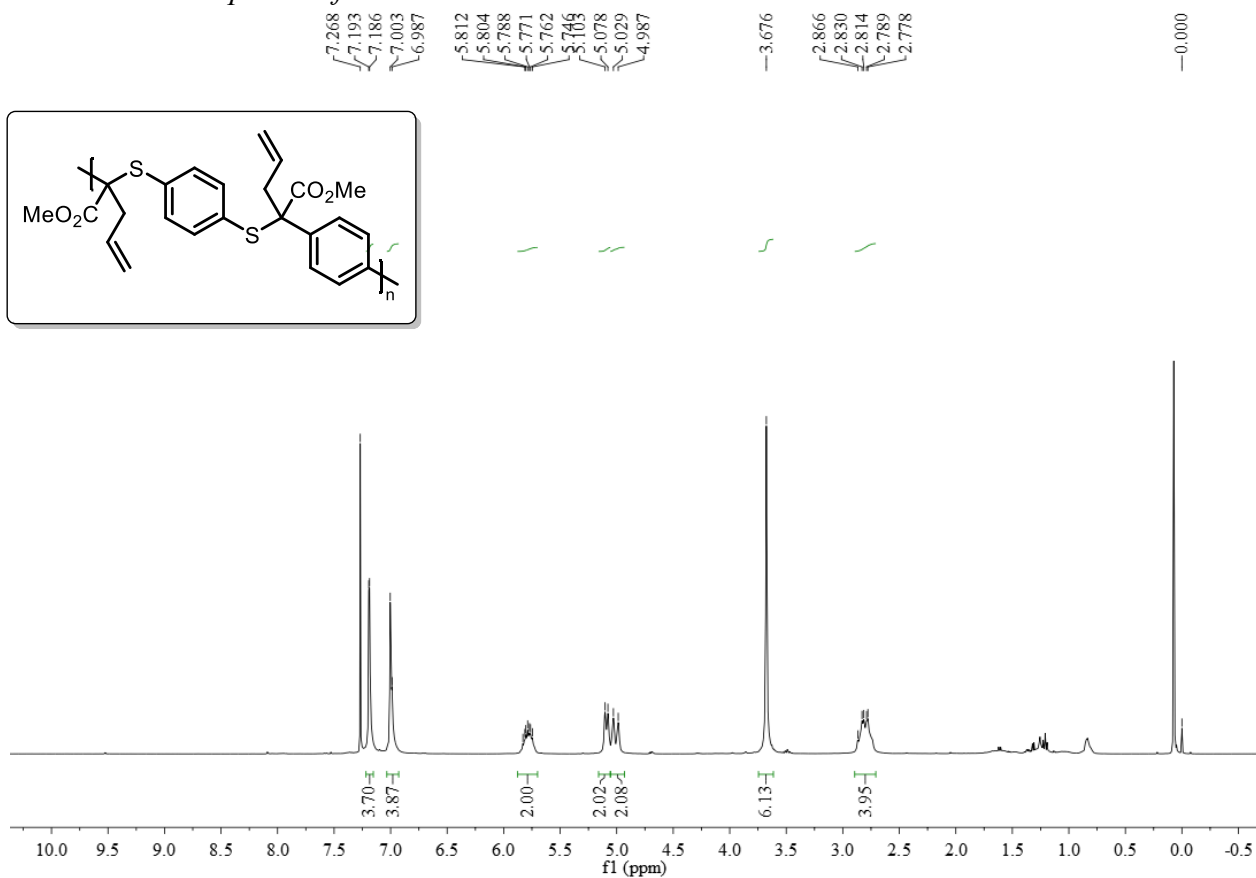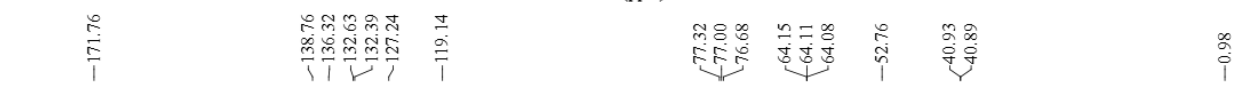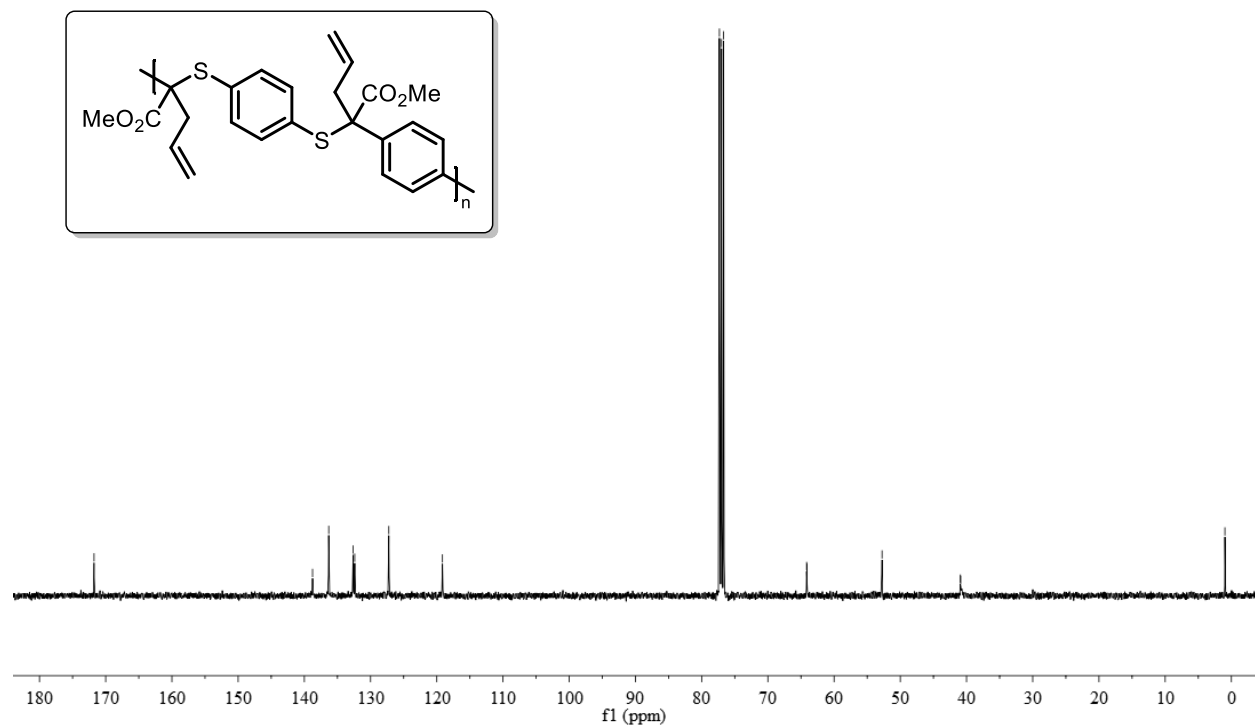

$^1\text{H}$  and  $^{13}\text{C}$  NMR spectra of **P5**

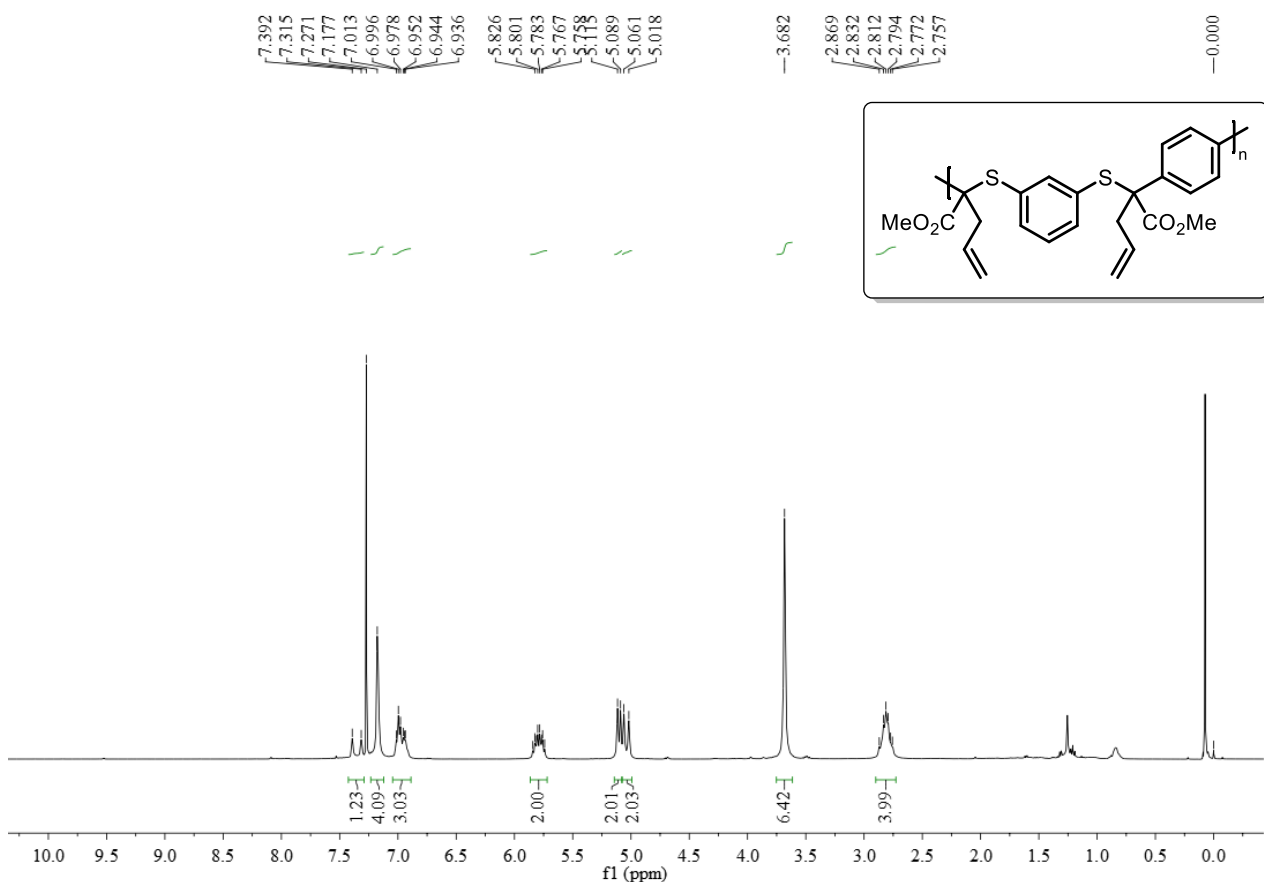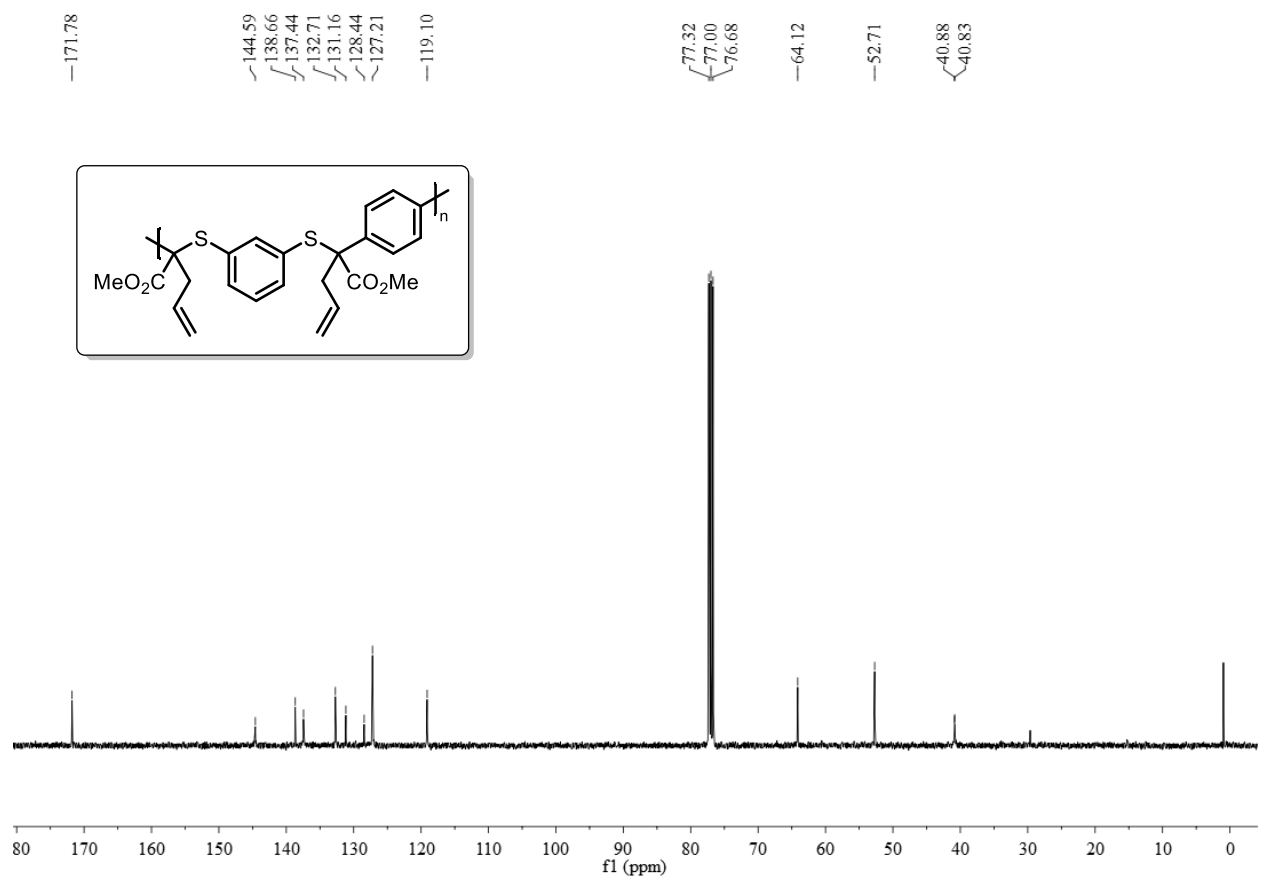

$^1\text{H}$  and  $^{13}\text{C}$  NMR spectra of **P6**

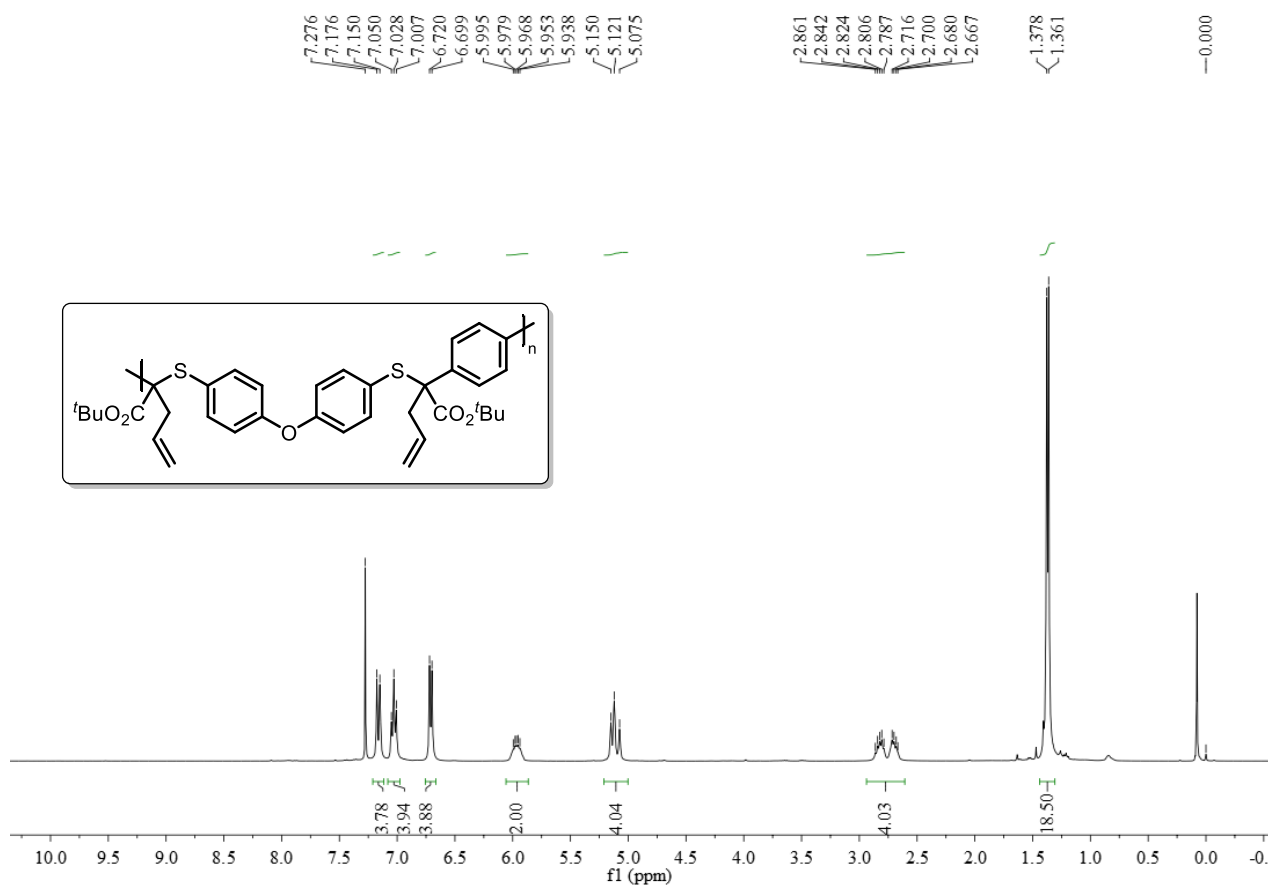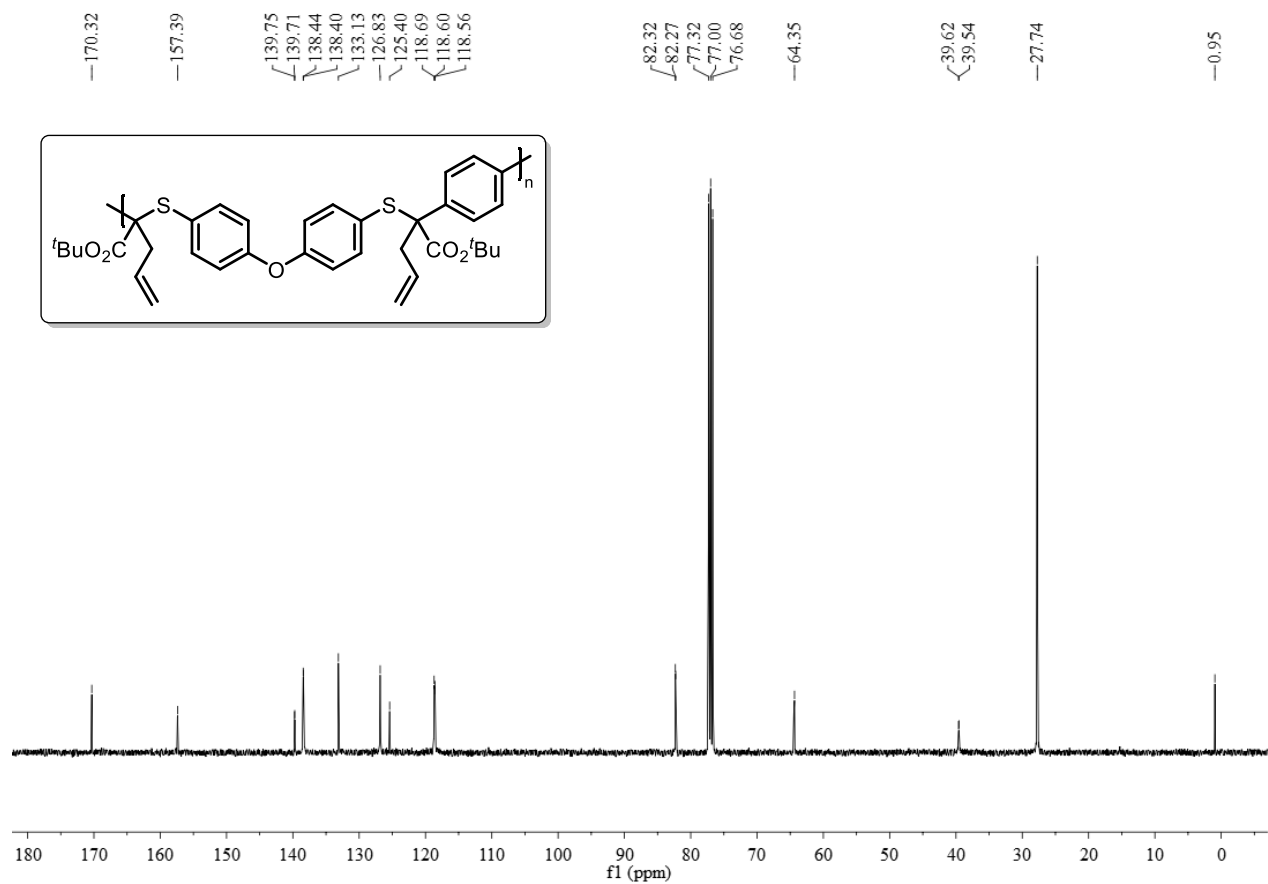

$^1\text{H}$  and  $^{13}\text{C}$  NMR spectra of **P7**

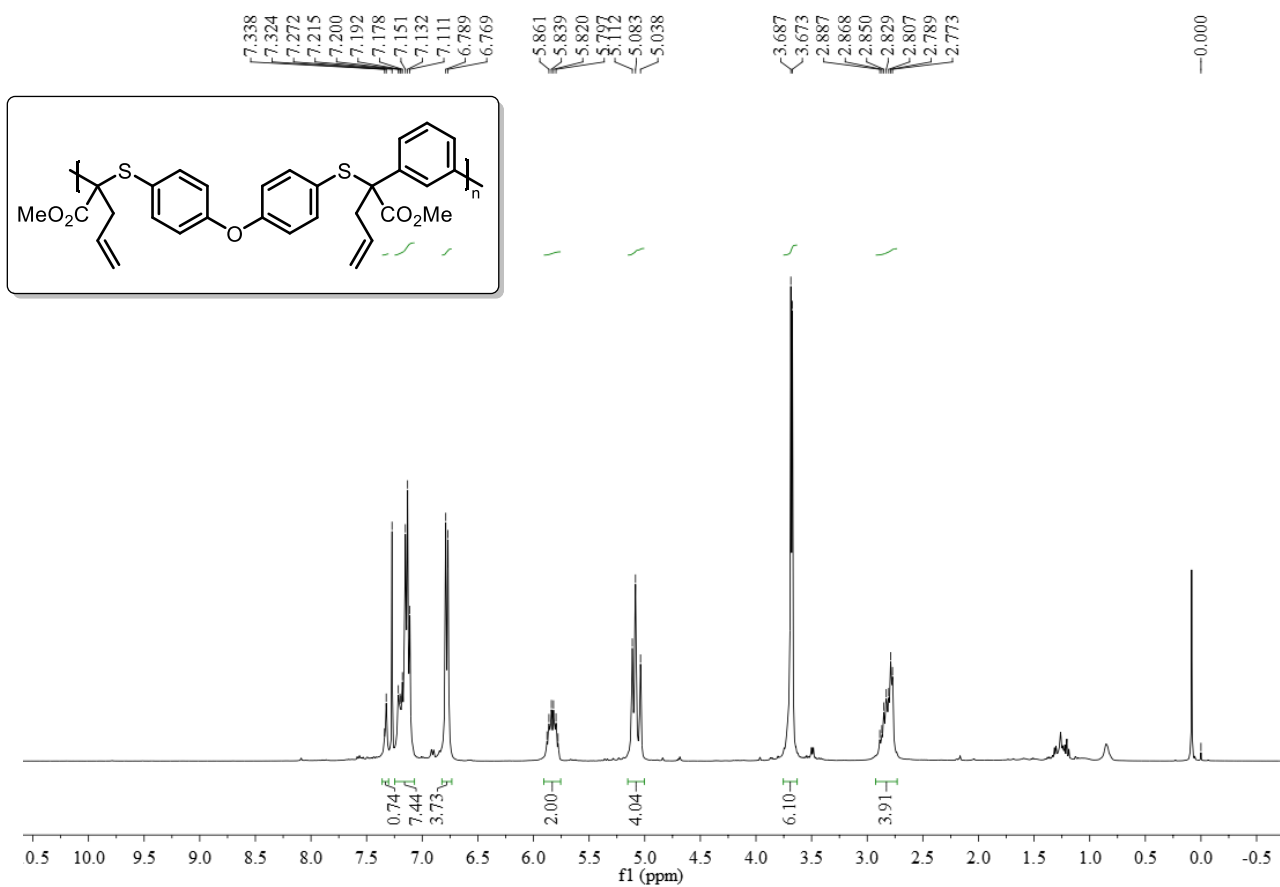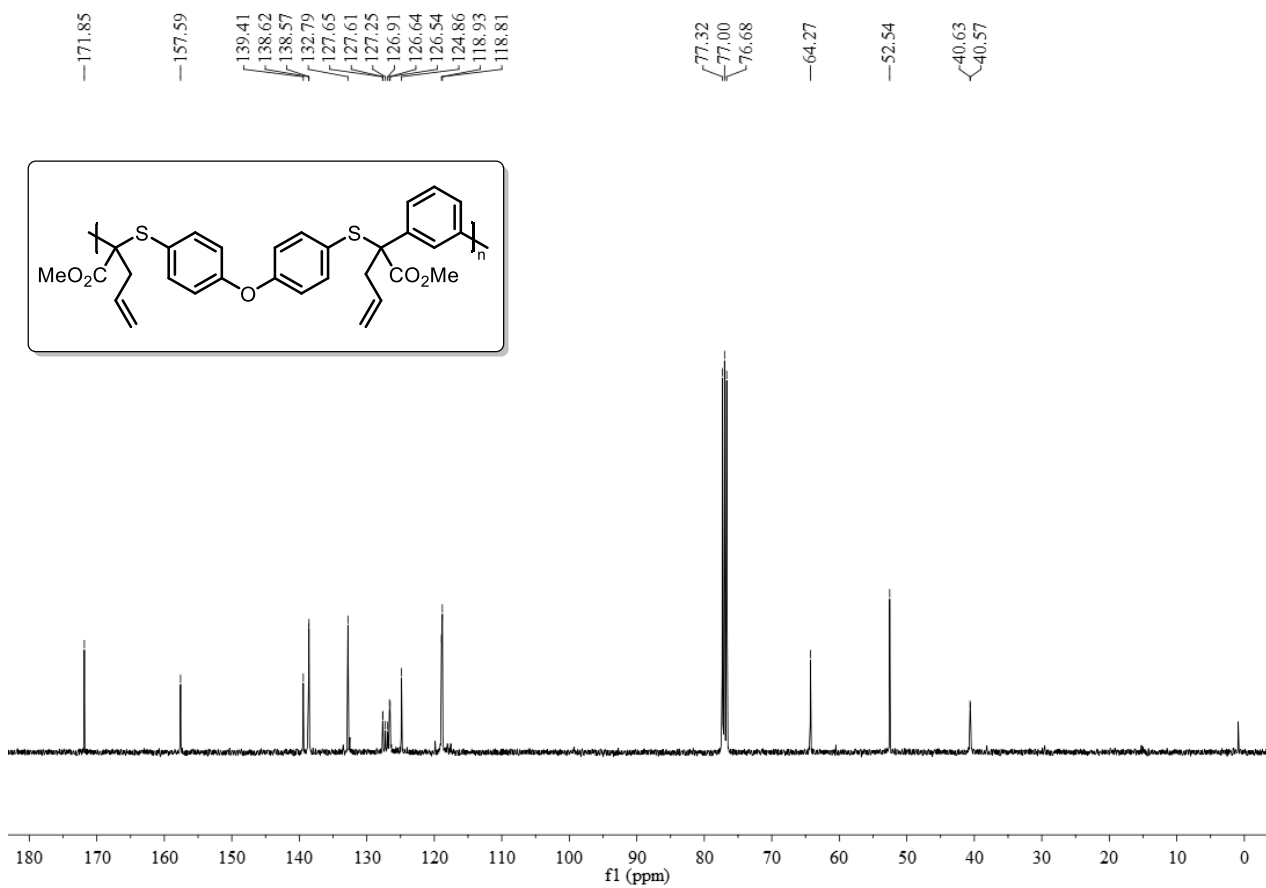

$^1\text{H}$  and  $^{13}\text{C}$  NMR spectra of **P8**

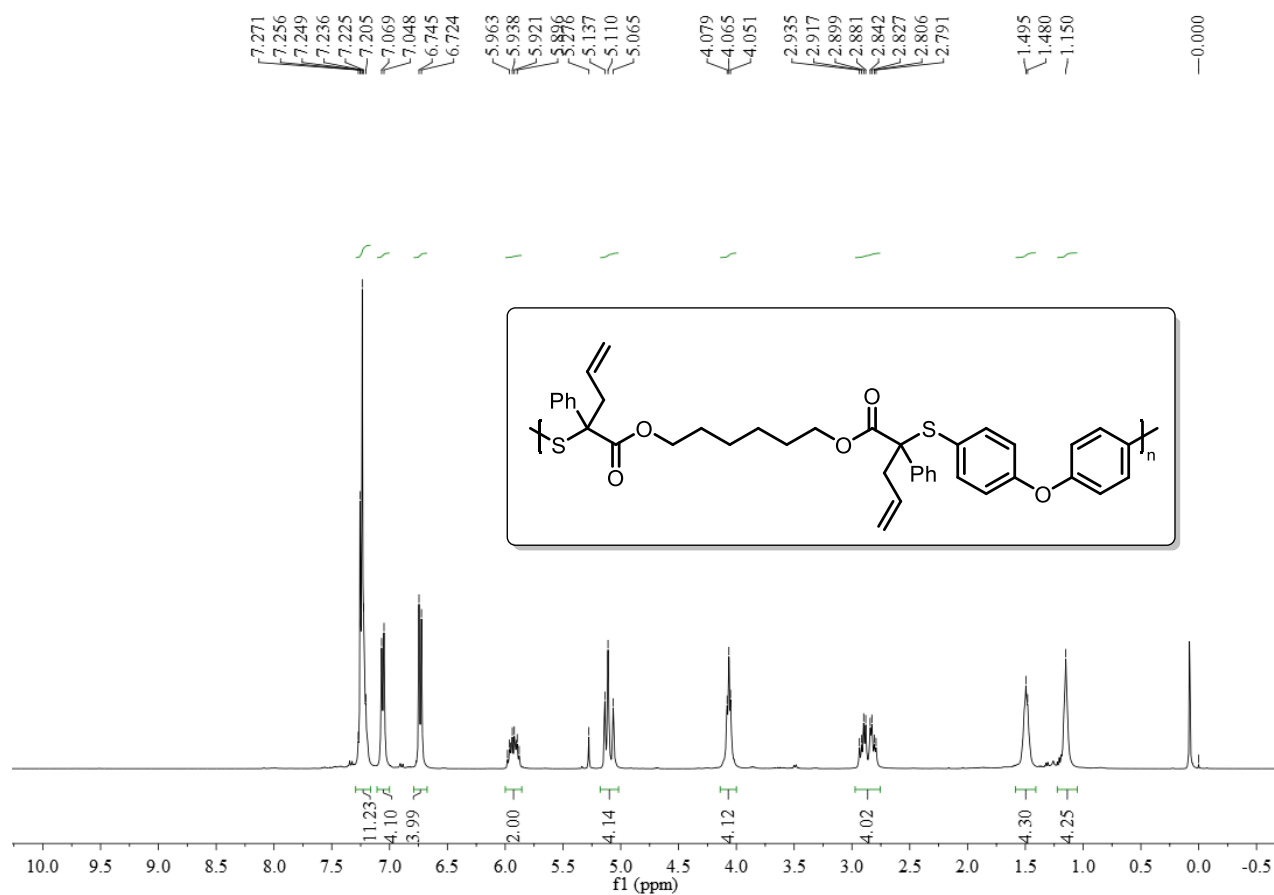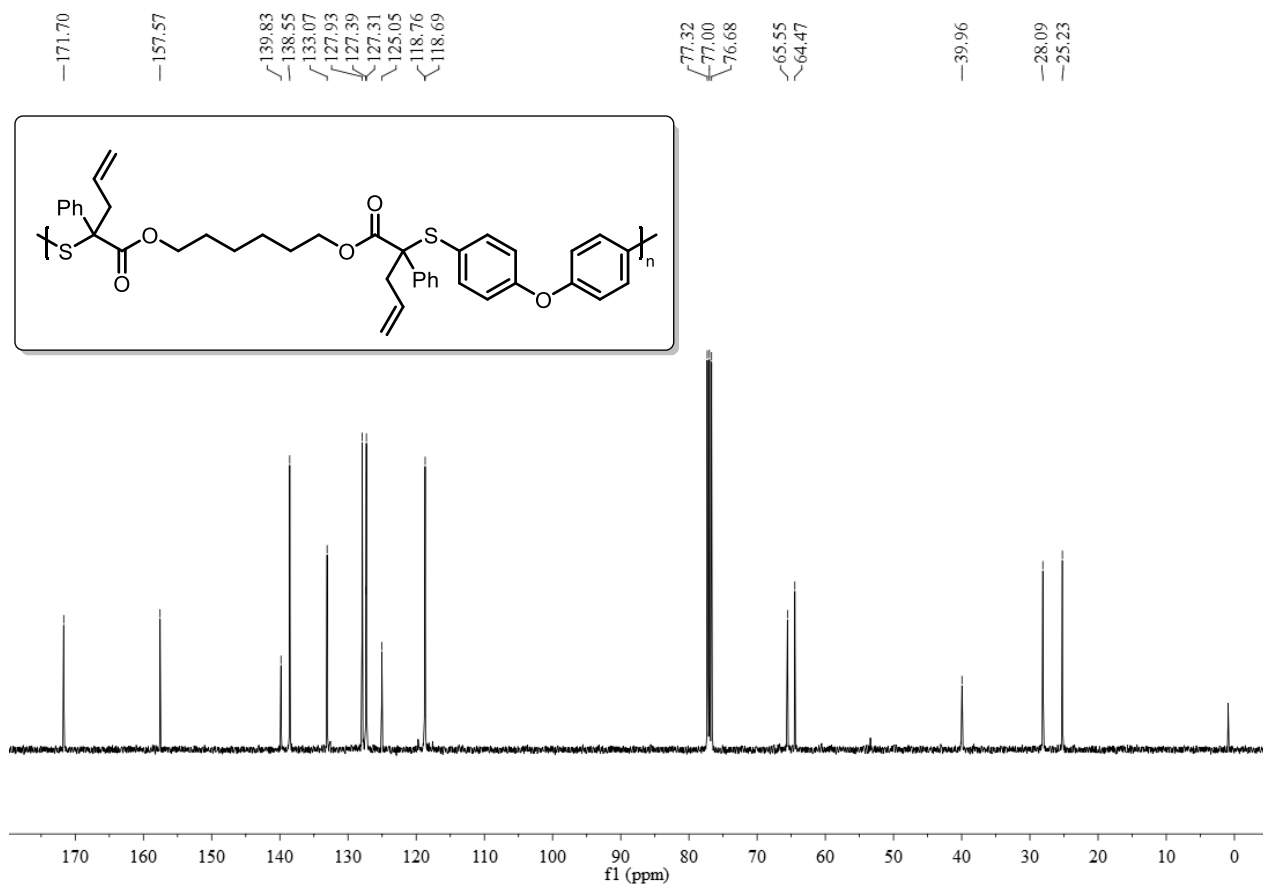

$^1\text{H}$  and  $^{13}\text{C}$  NMR spectra of **P9**

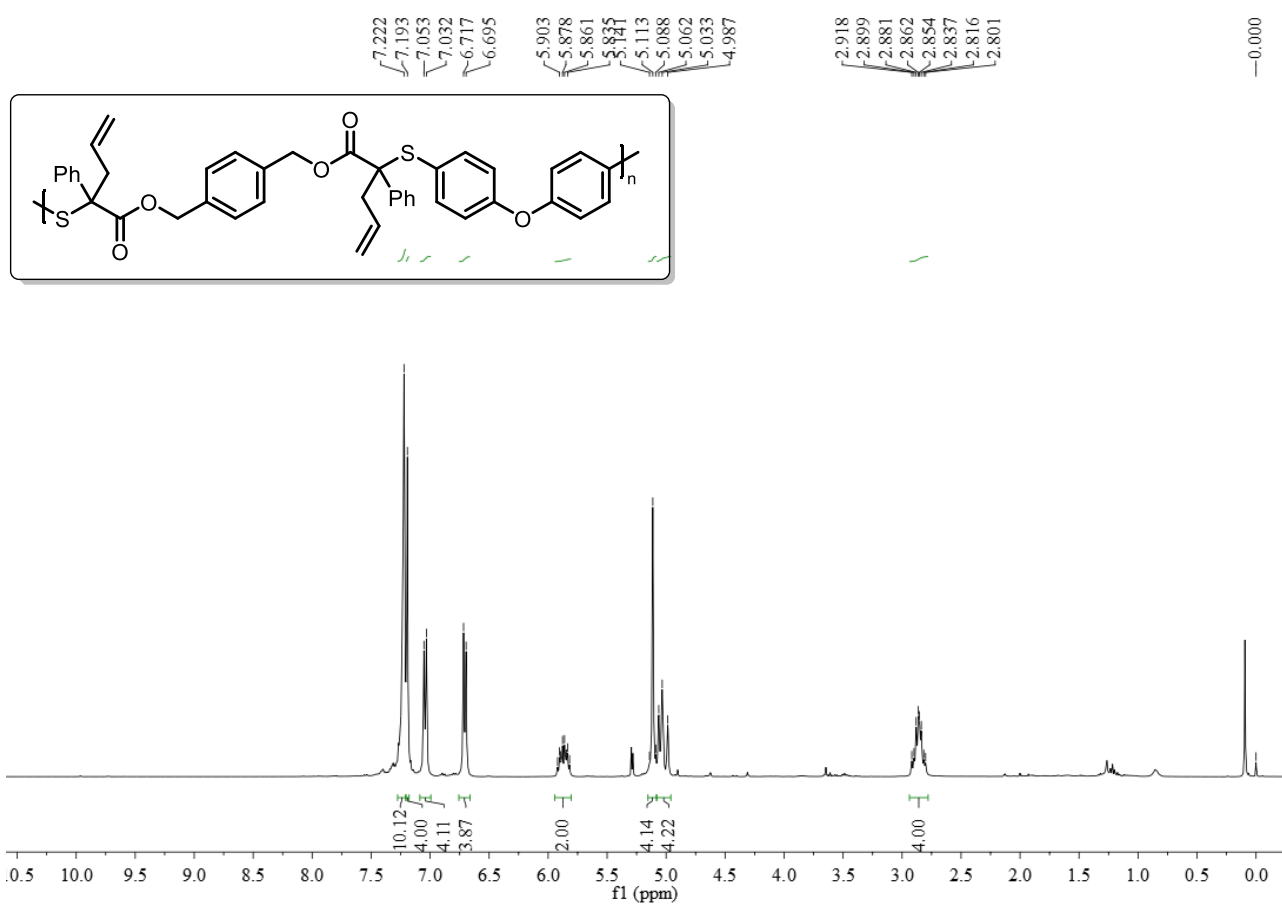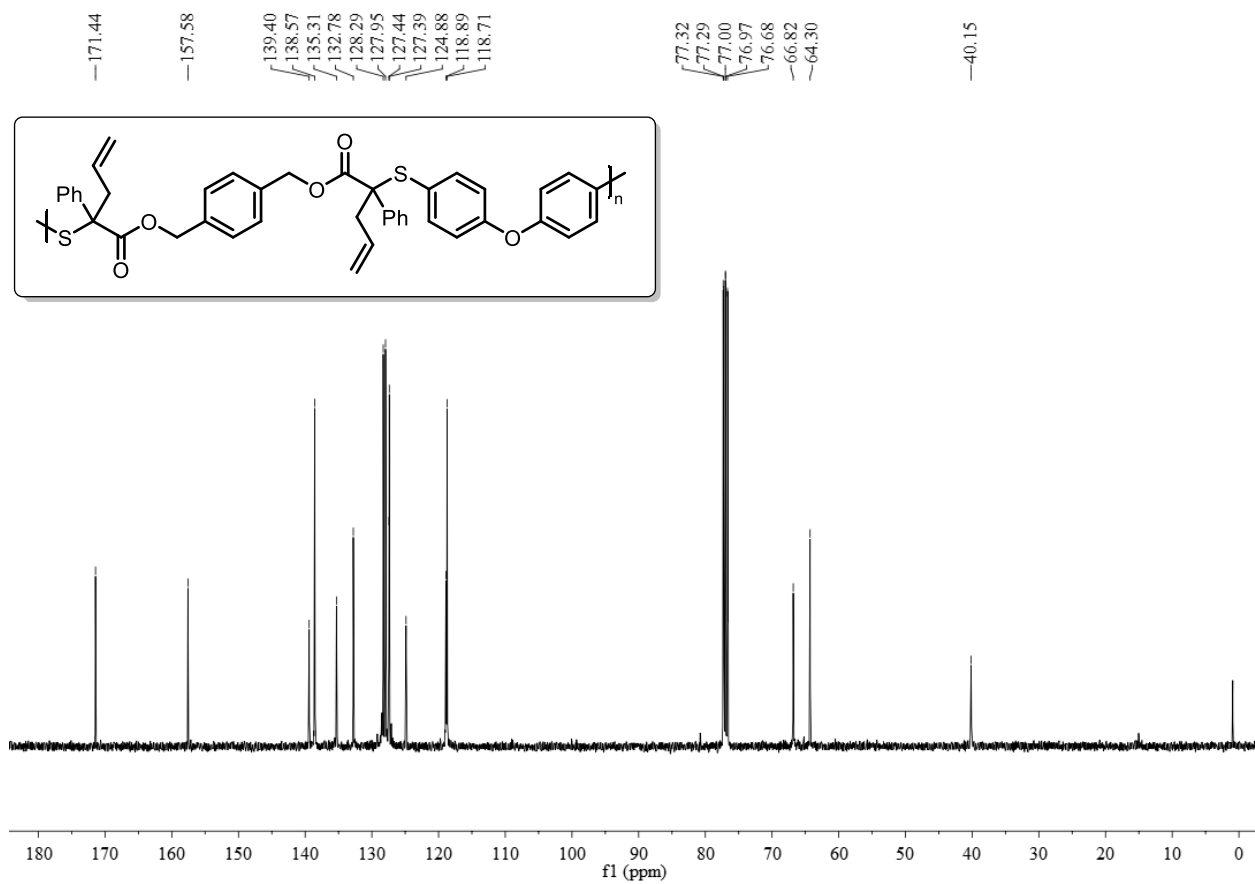

<sup>1</sup>H and <sup>13</sup>C NMR spectra of **P10**

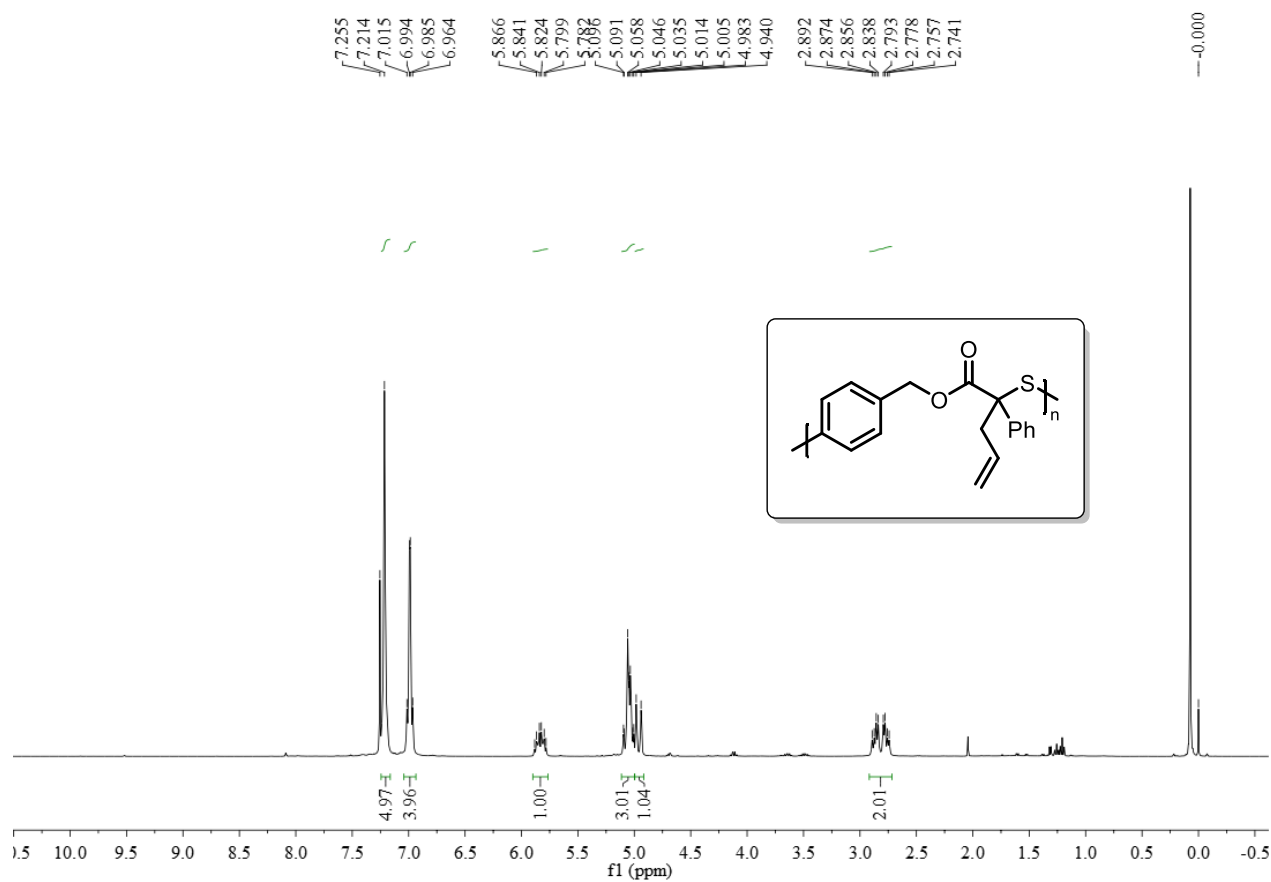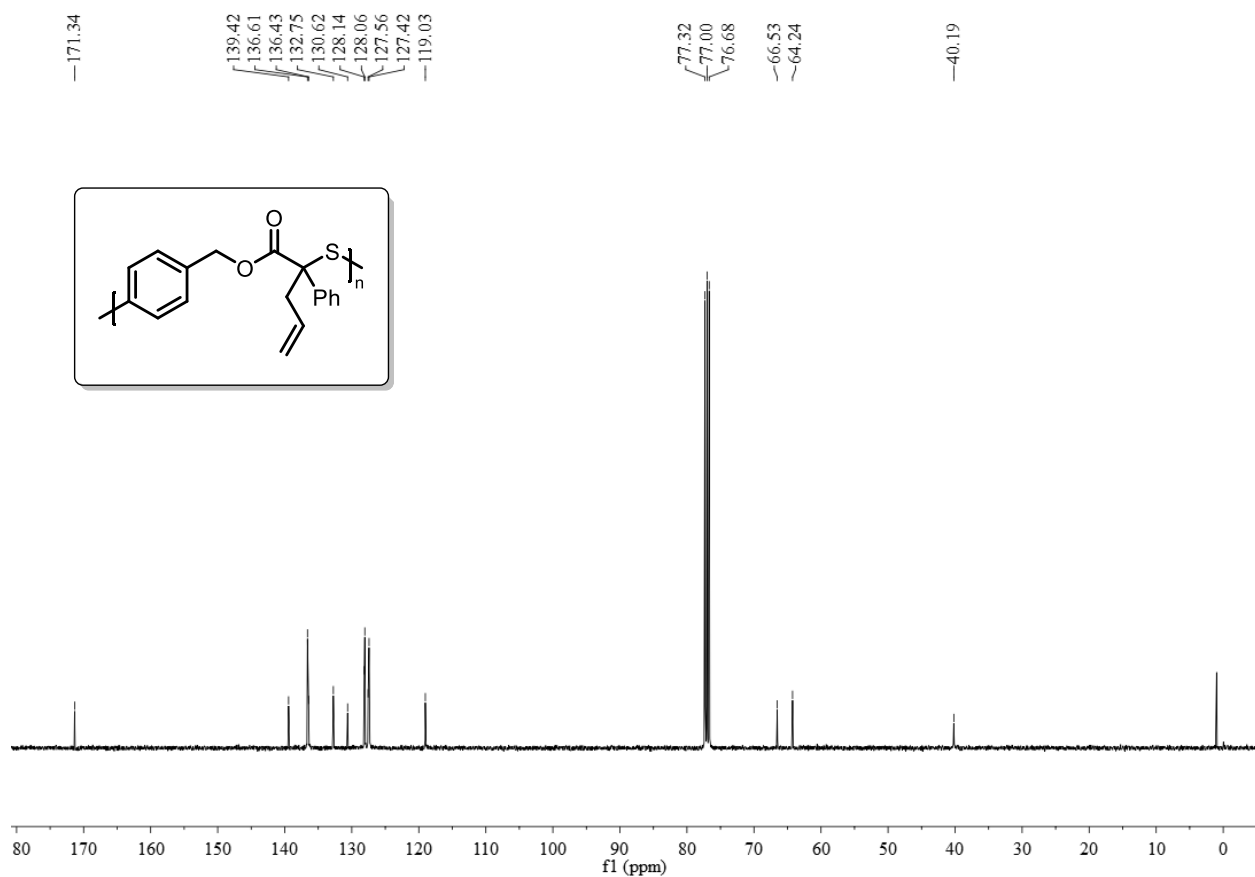

$^1\text{H}$  and  $^{13}\text{C}$  NMR spectra of **P11**

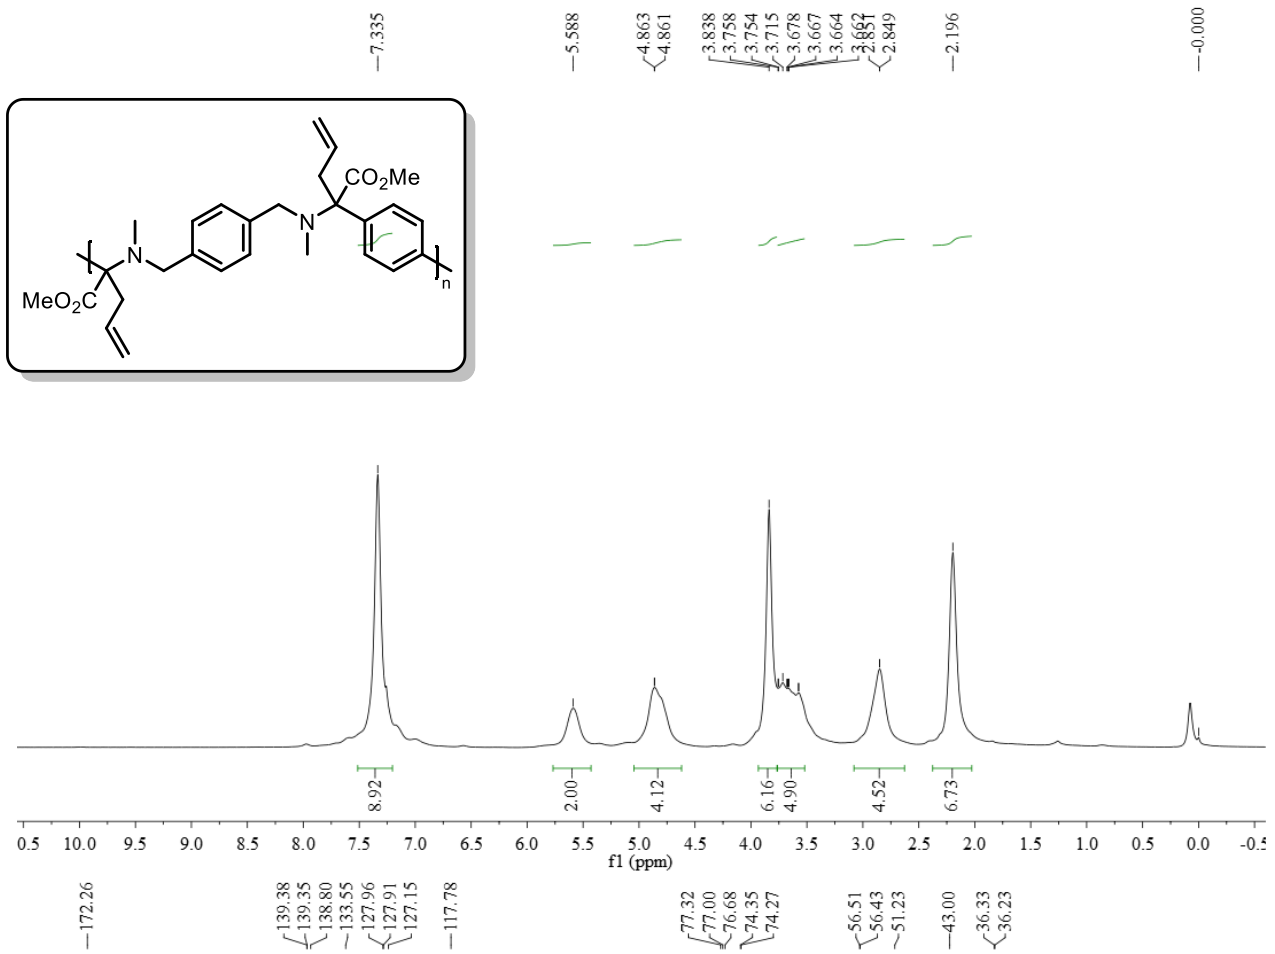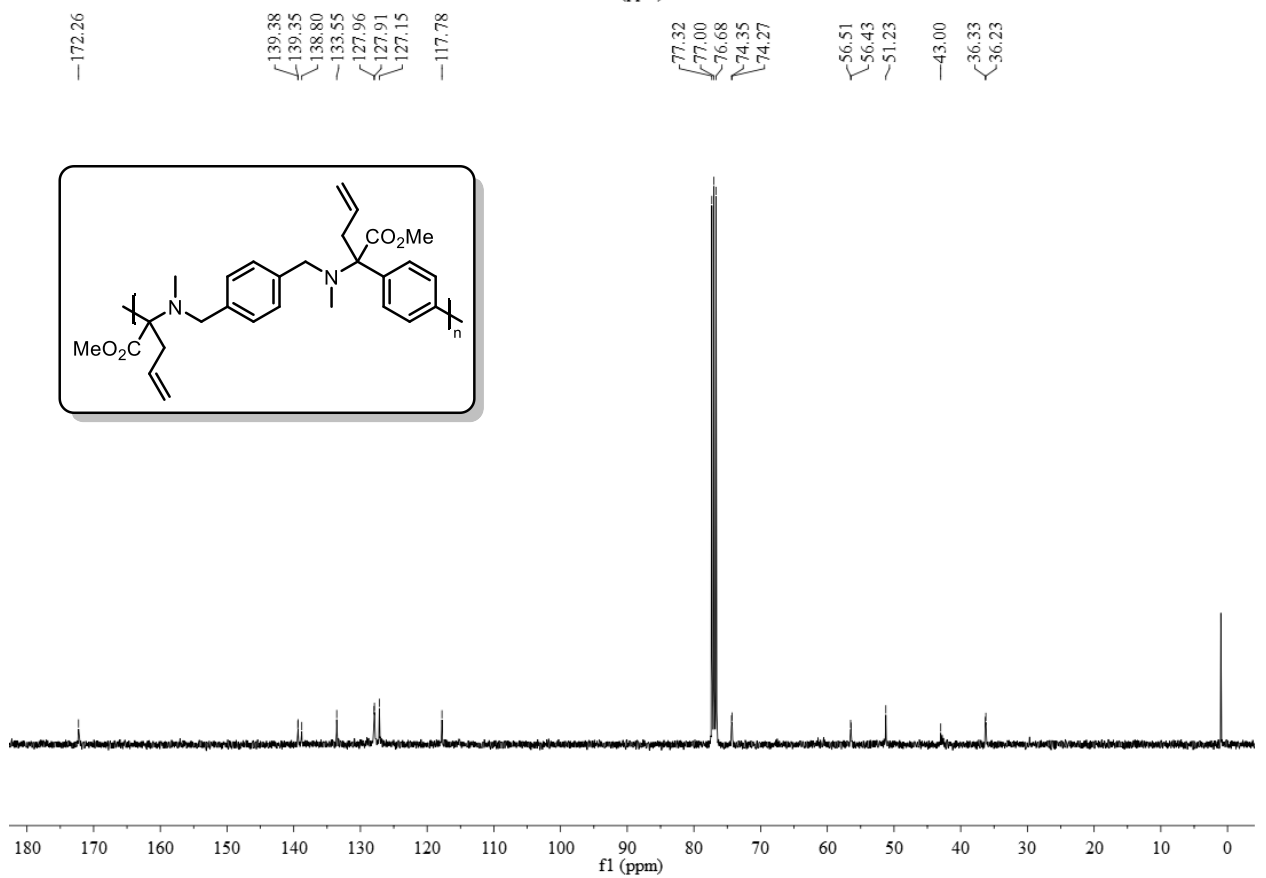



### 3) MALDI-TOF-MS spectrum of P10

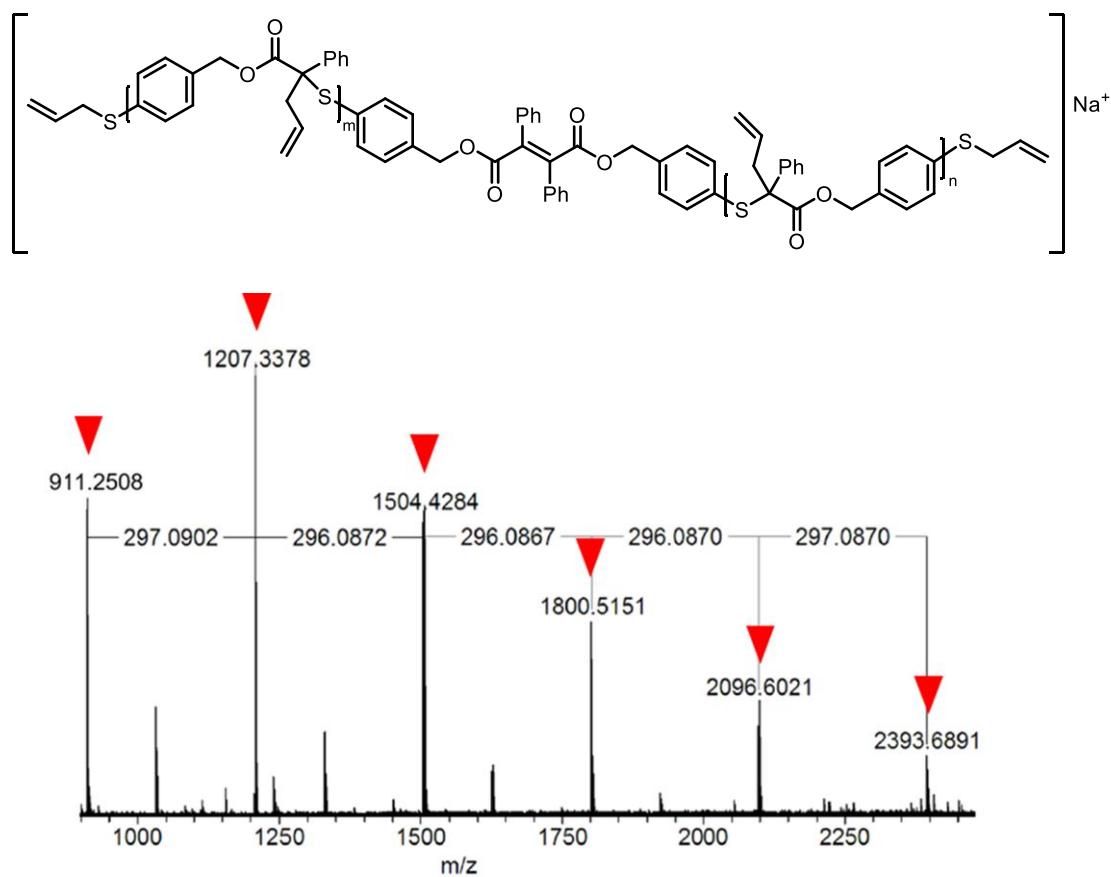

Figure S1. MALDI-TOF-MS spectrum of polymer P10.

### 4) HRMS analysis of hydrolysis of P10

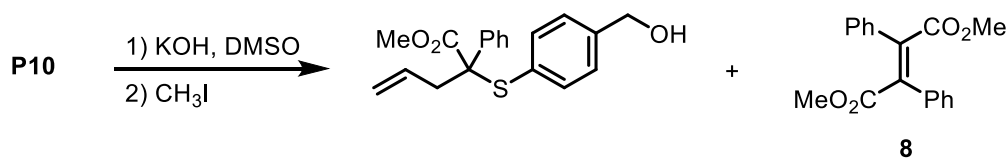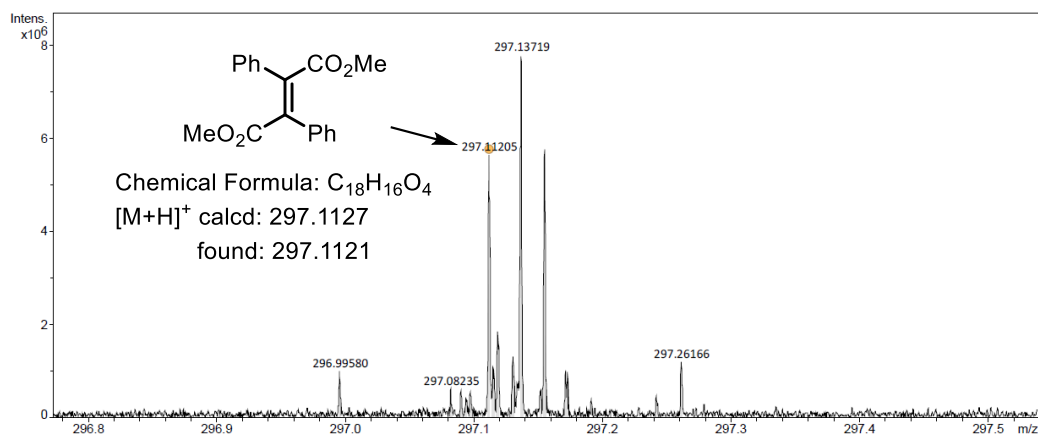

Figure S2. HRMS analysis of 8

## 5) SEC traces of the polymer products

a) P1

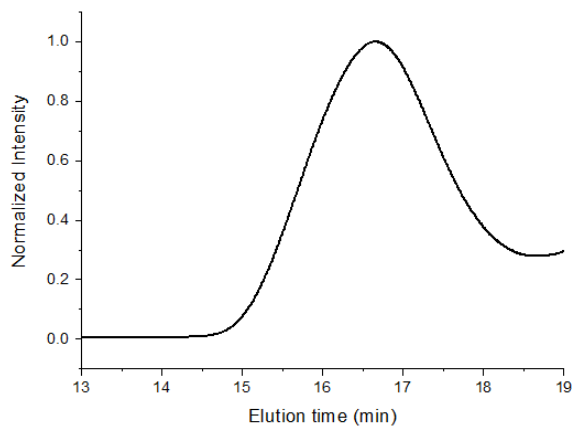

b) P2

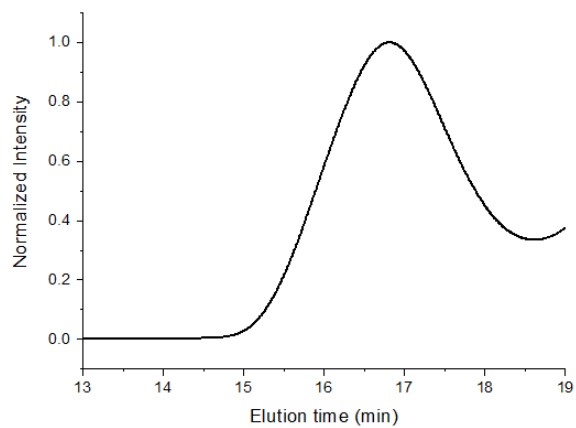

c) P3

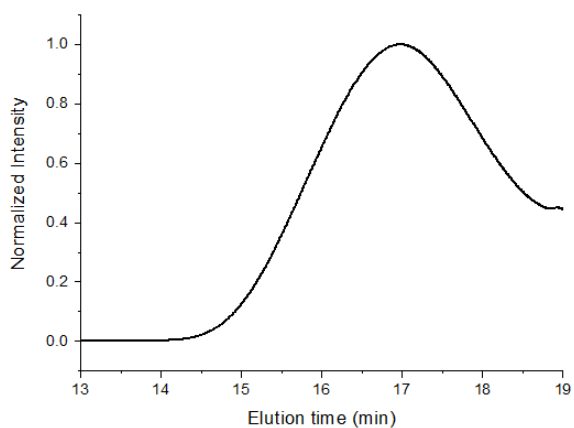

d) P4

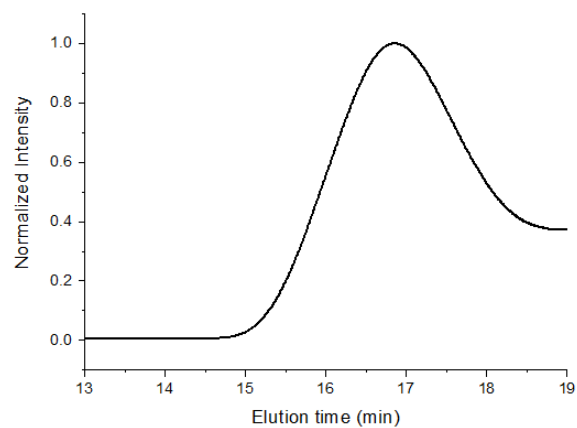

e) P5

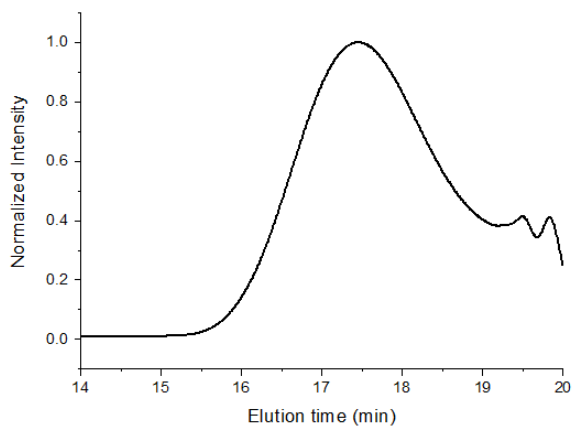

f) P6

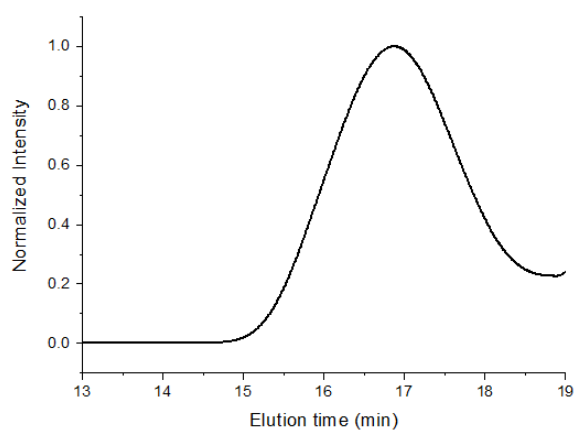

**g) P7**

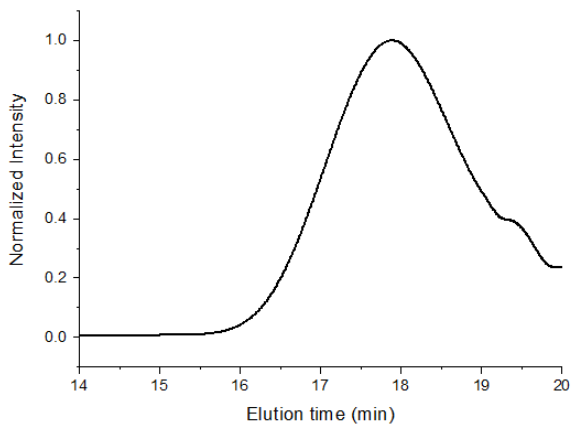

**h) P8**

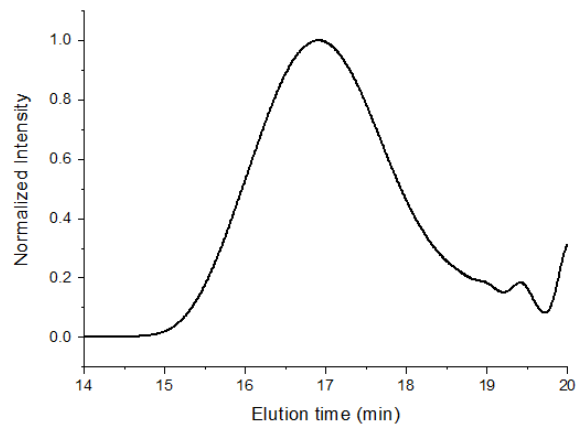

**i) P9**

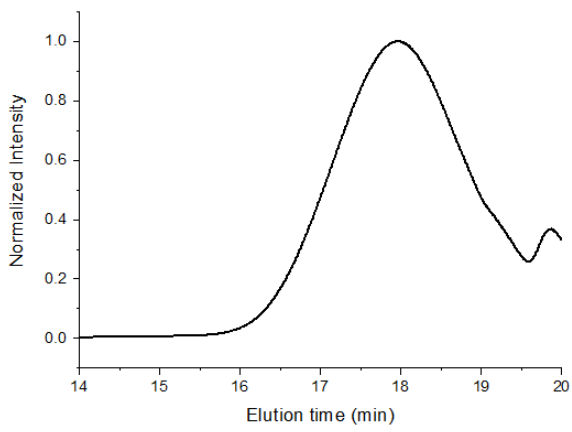

**j) P10**

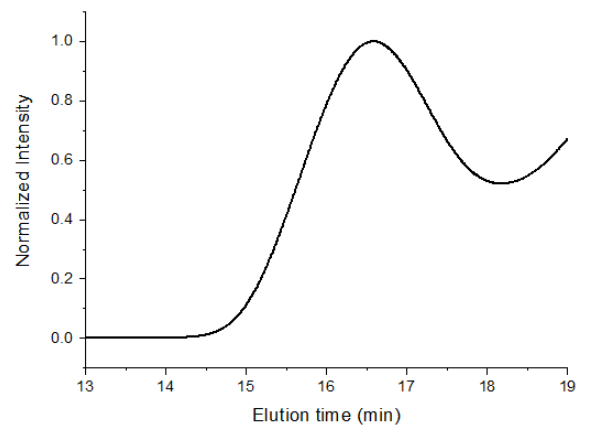

**k) P11**

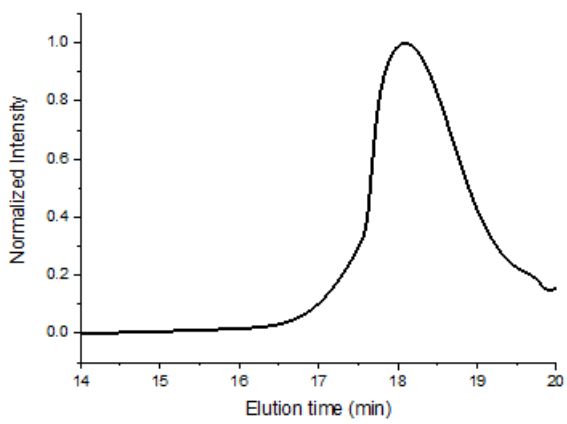

## 6) TGA data of the polymer products

a) P1

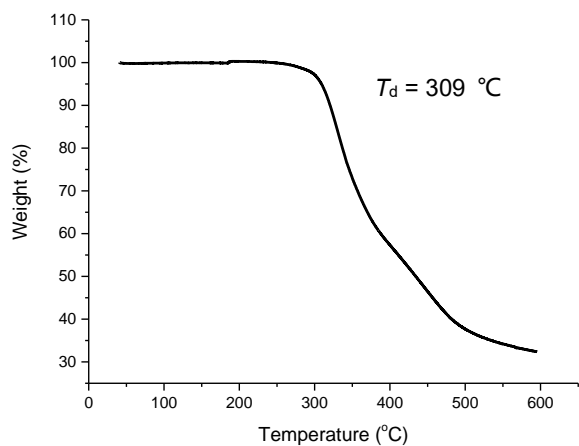

b) P2

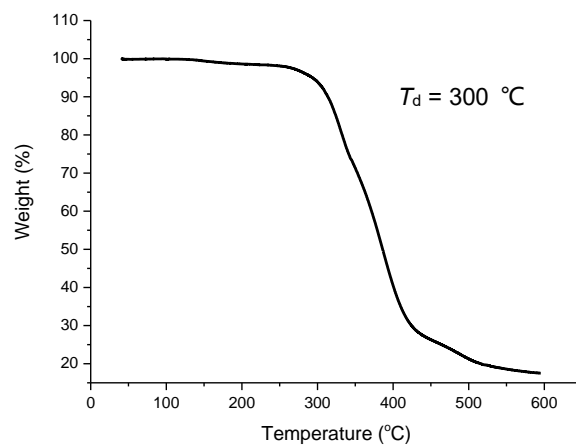

c) P3

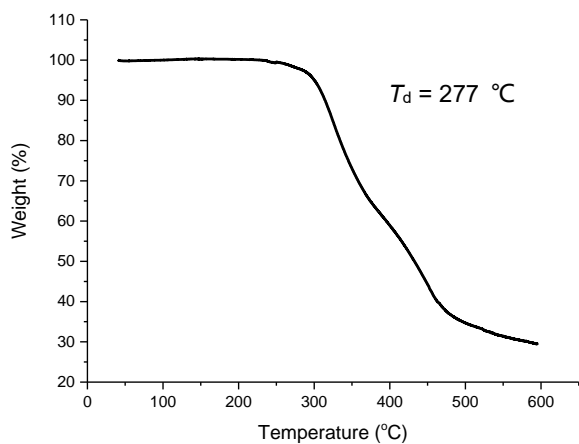

d) P4

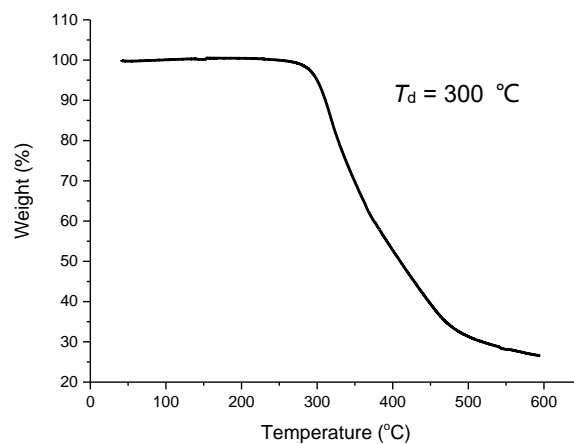

e) P5

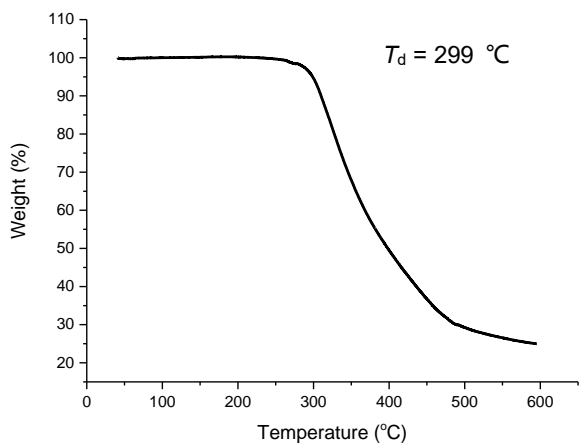

f) P6

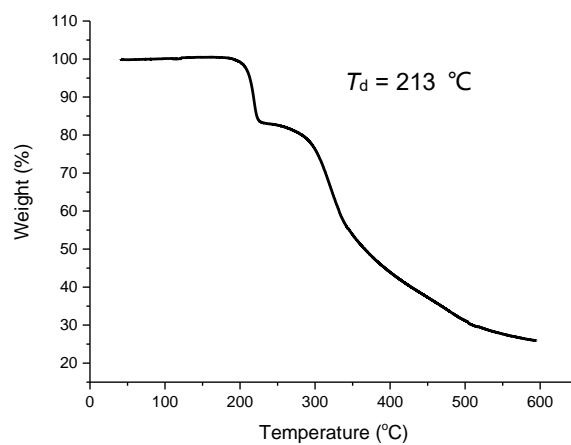

**g) P7**

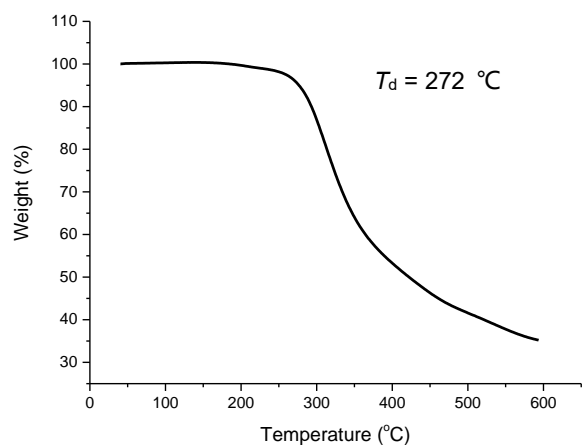

**h) P8**

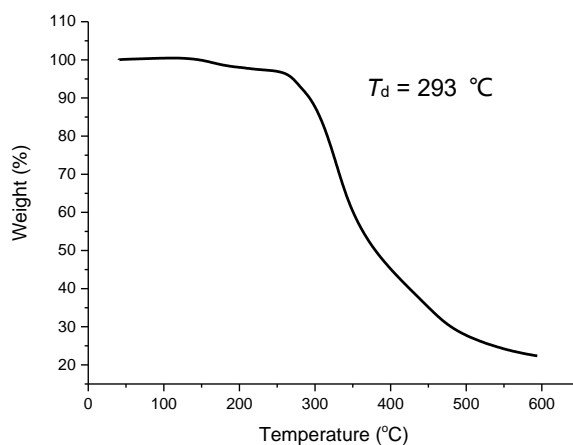

**i) P9**

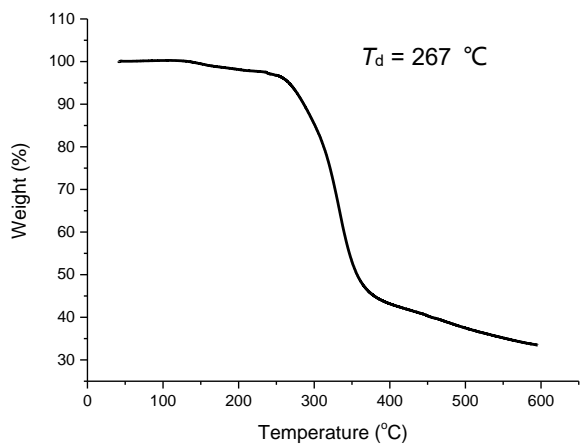

**j) P10**

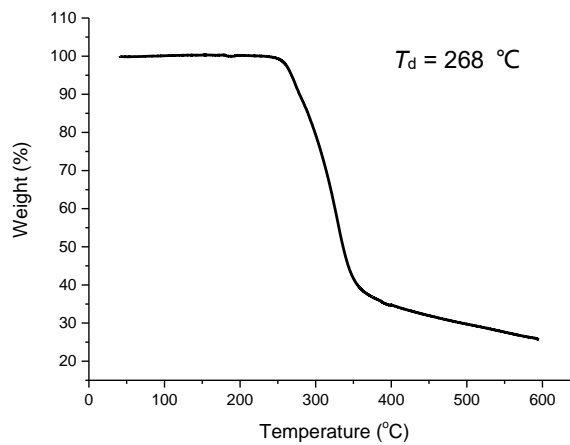

**k) P11**

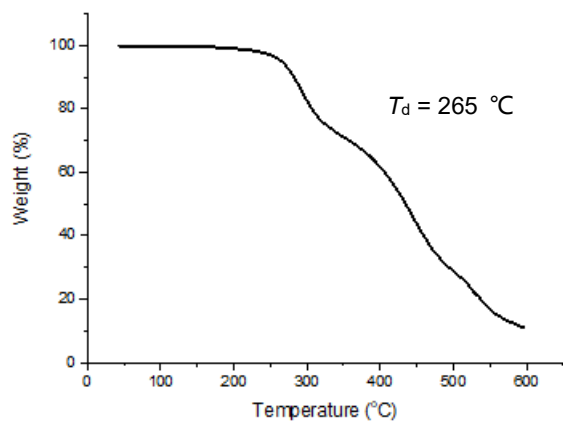

## 7) DSC data of the polymer products

a) P1

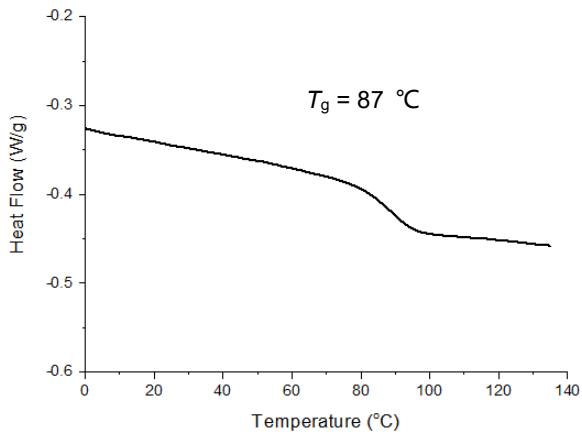

b) P2

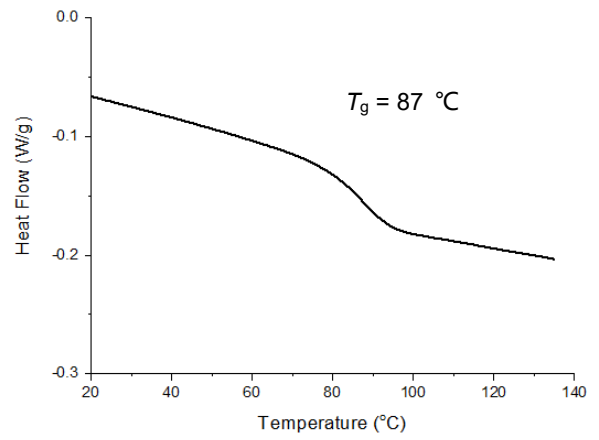

c) P3

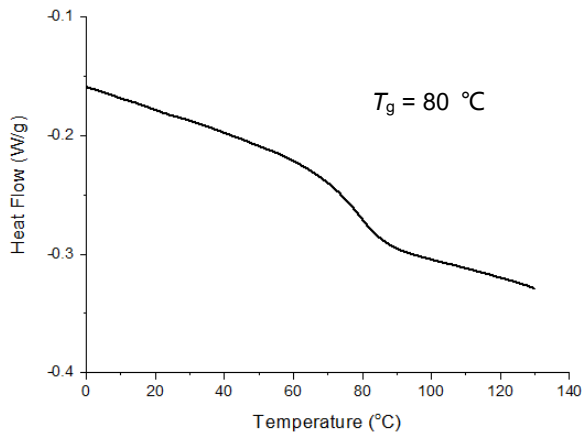

d) P4

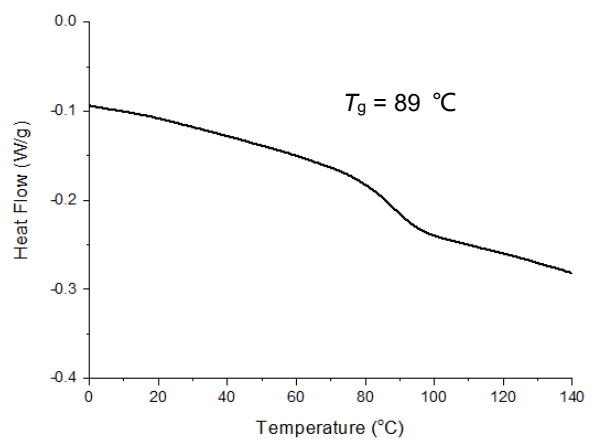

e) P5

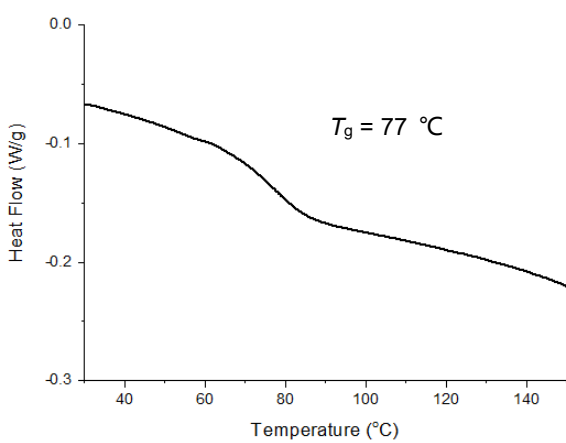

f) P6

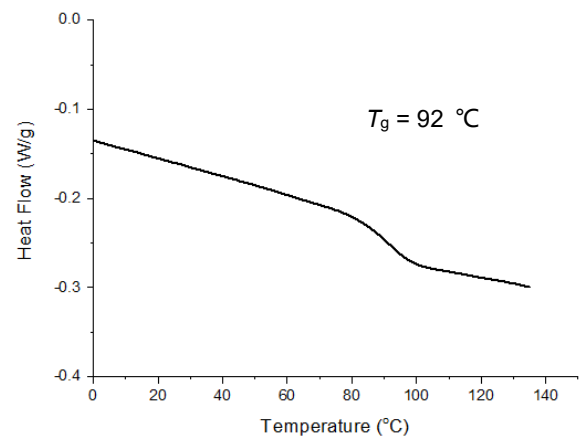

**g) P7**

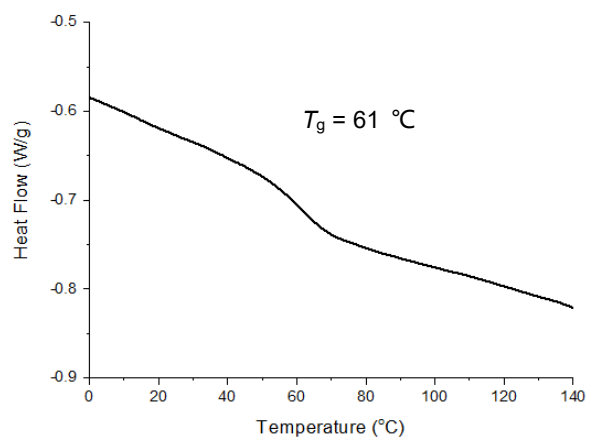

**h) P8**

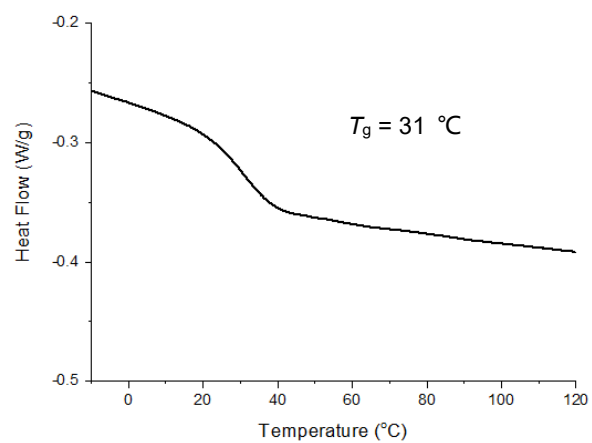

**i) P9**

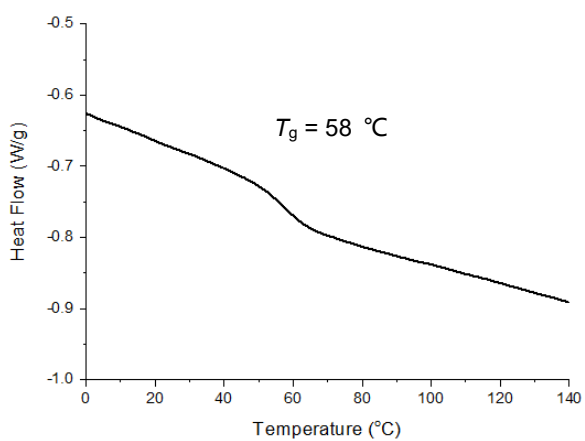

**j) P10**

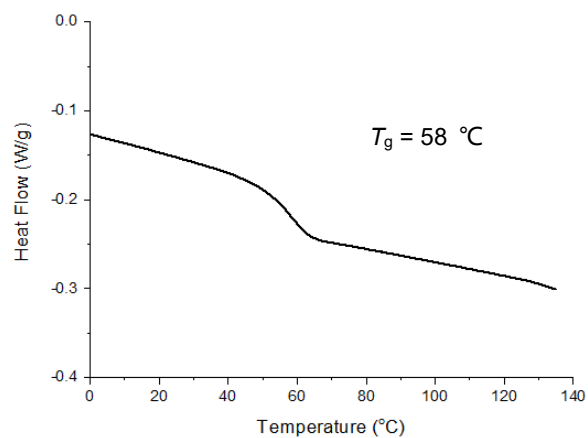

**k) P11**

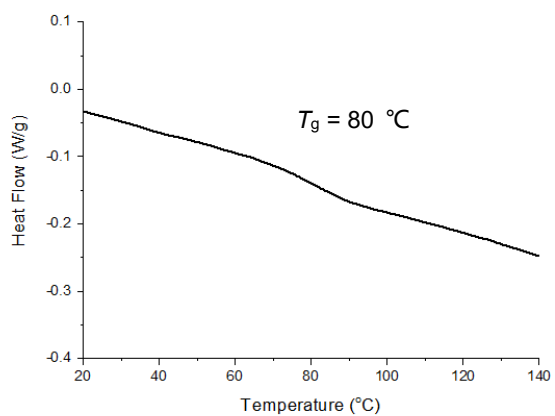

Supplement: d2py00162d1.pdf [file d2py00162d1.pdf]
